# Supplementary material for: Modelling time‐course relationships with multiple treatments: Model‐based network meta‐analysis for continuous summary outcomes
Source: PubMed Central journal article supplement (PMC6563489; doi:10.1002/jrsm.1351), 2019-05-29

# Convergence diagnostics for final model

## Table of Contents

- [d.Emax](#)
- [m.ET50](#)
- [m.mu](#)
- [sd.mu](#)
- [deviance](#)

## Plots for d.Emax

d.Emax[1]. Error in bw.SJ(x, method = "ste"): sample is too sparse to find TD

### Diagnostics for d.Emax[2]

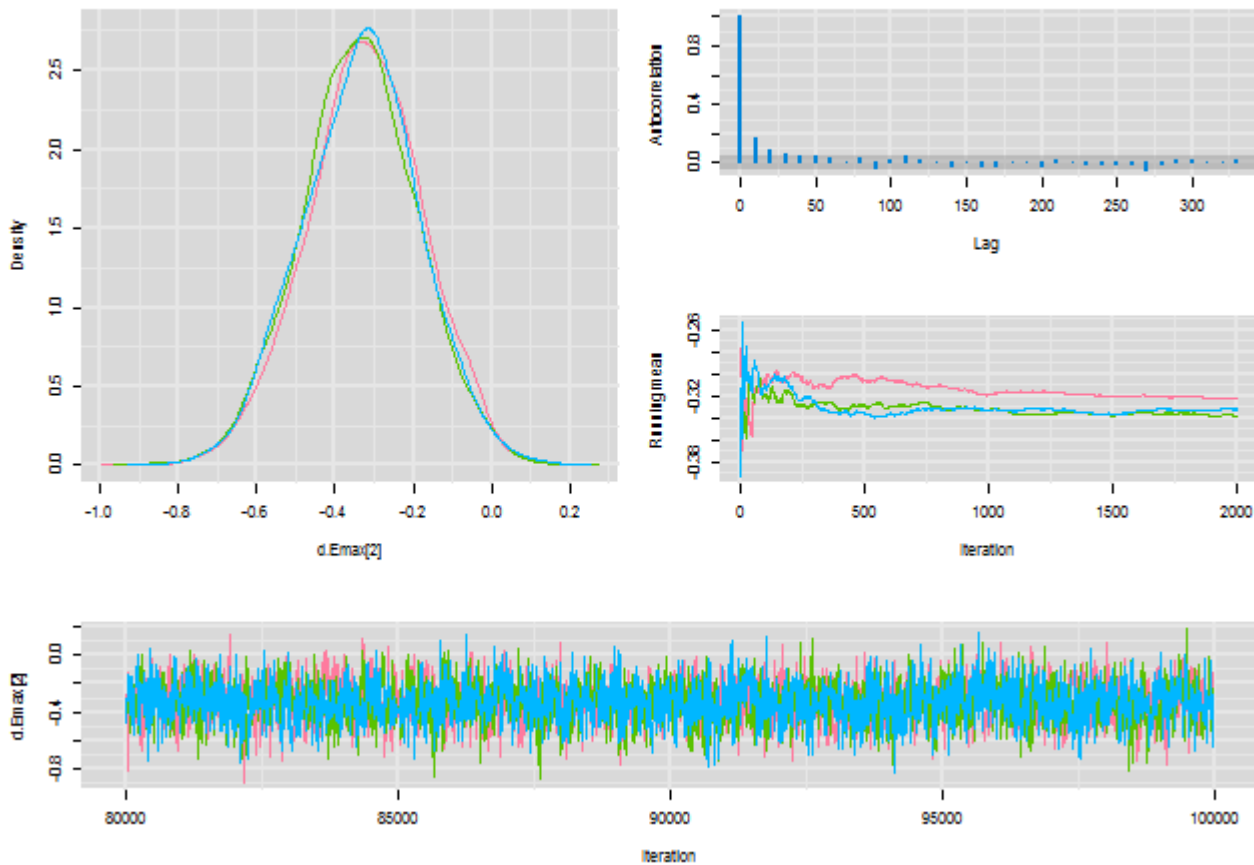

### Diagnostics for d.Emax[3]

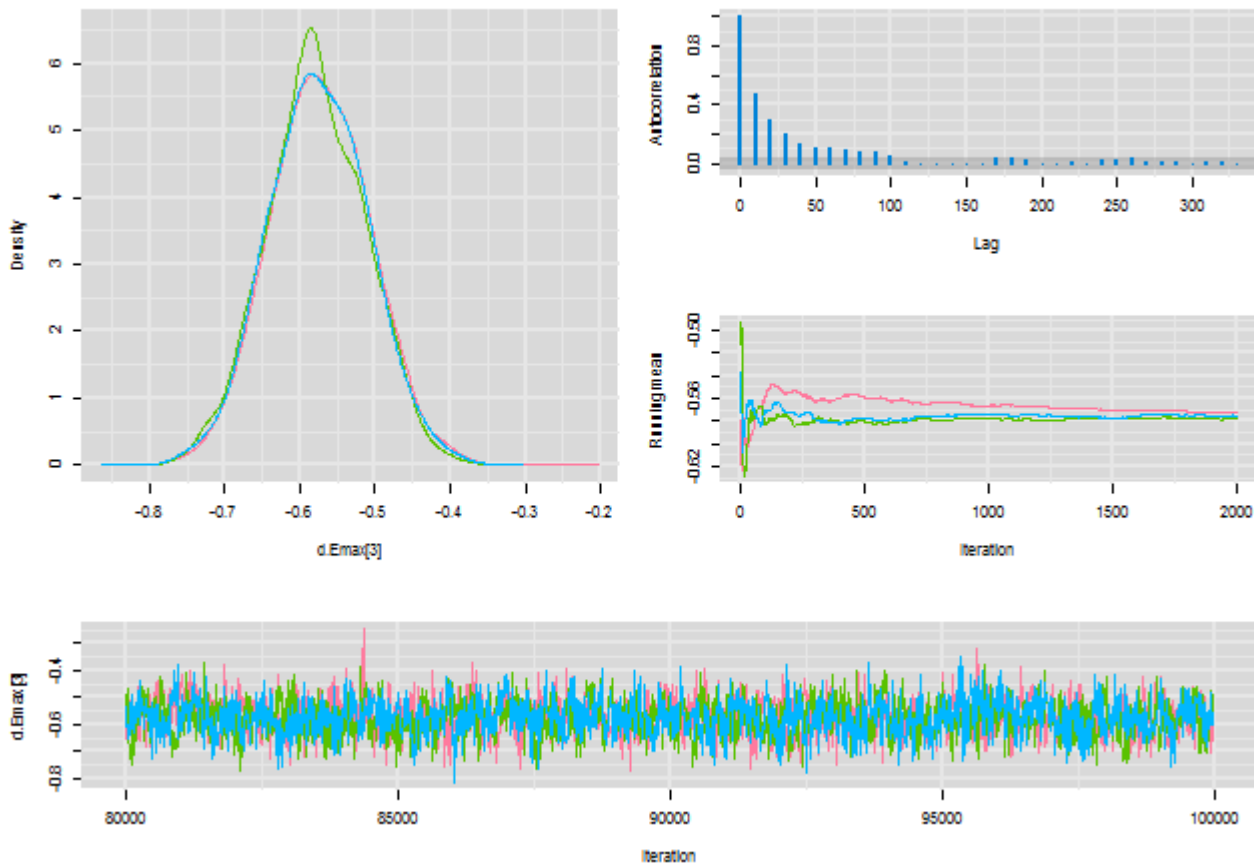

### Diagnostics for d.Emax[4]

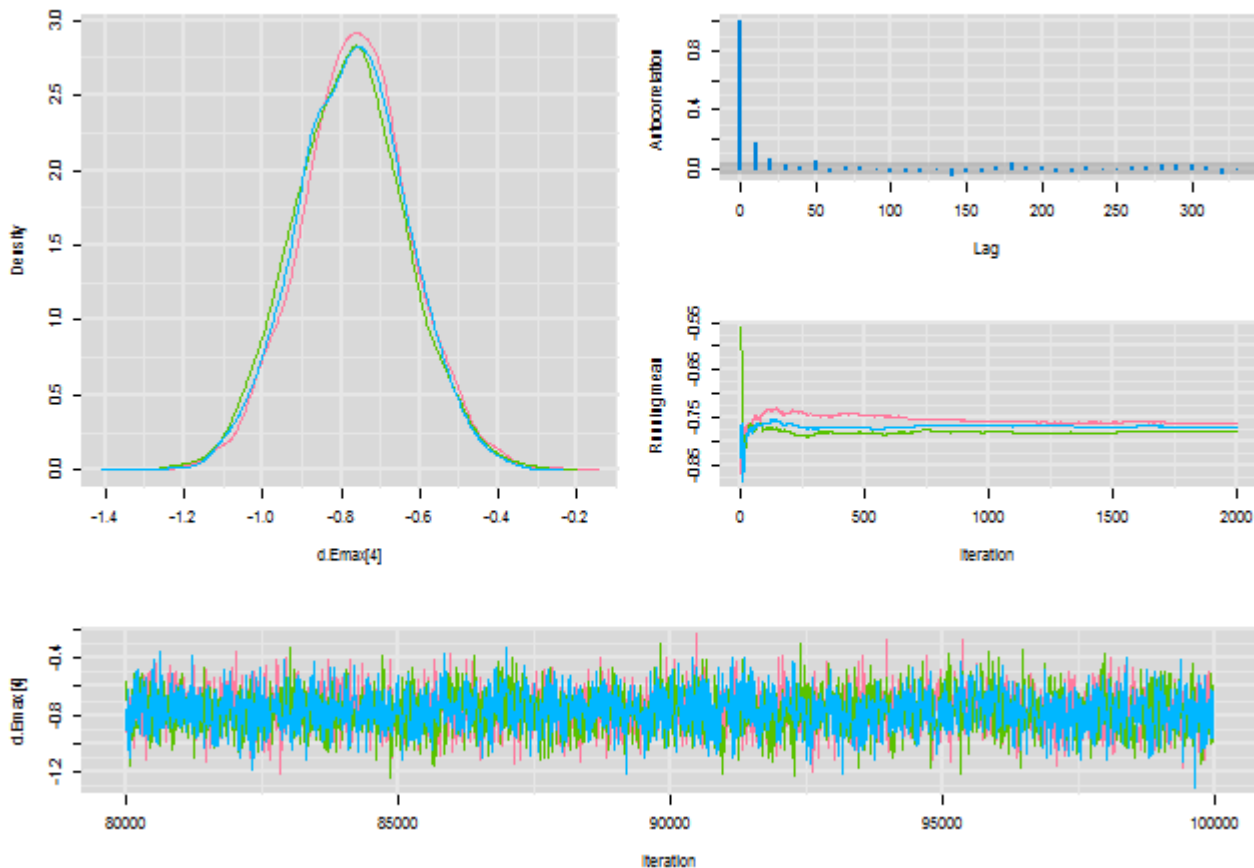

### Diagnostics for d.Emax[5]

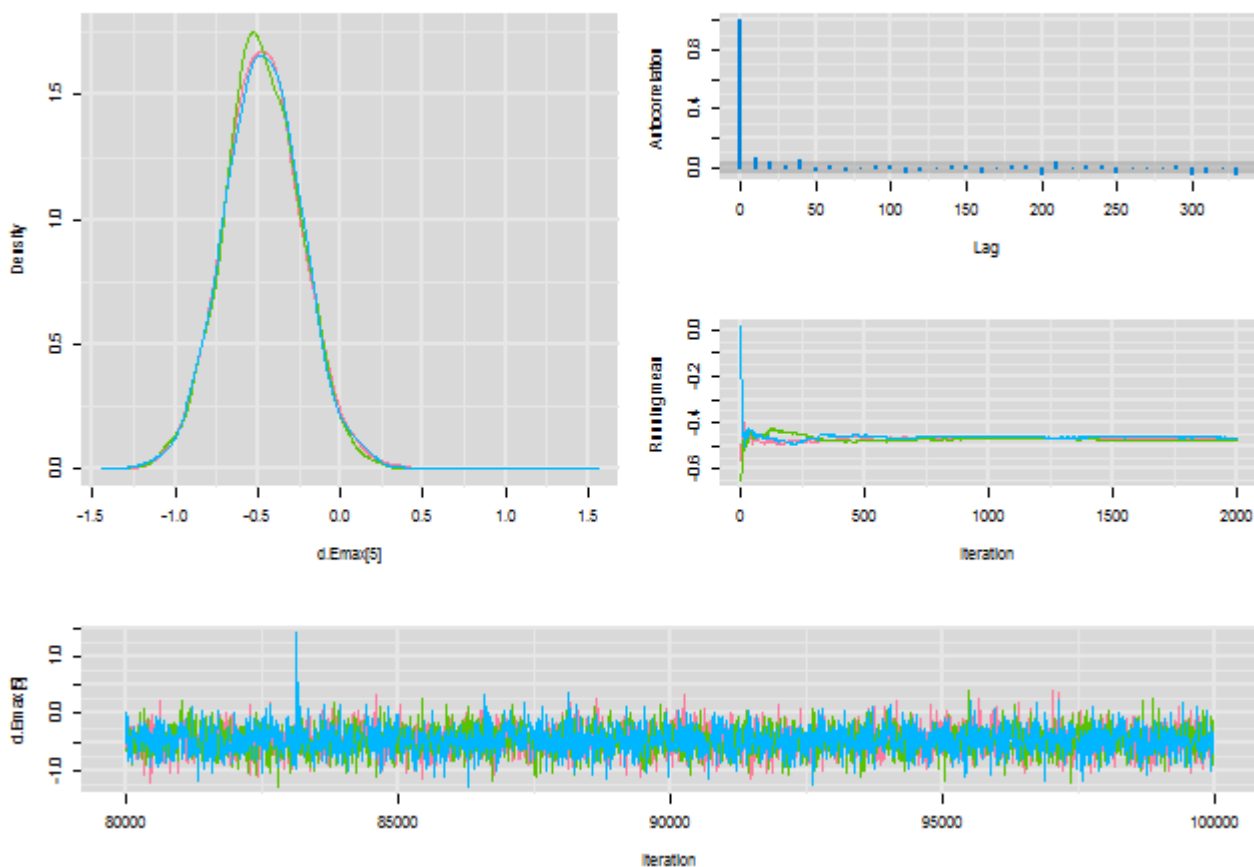

### Diagnostics for d.Emax[6]

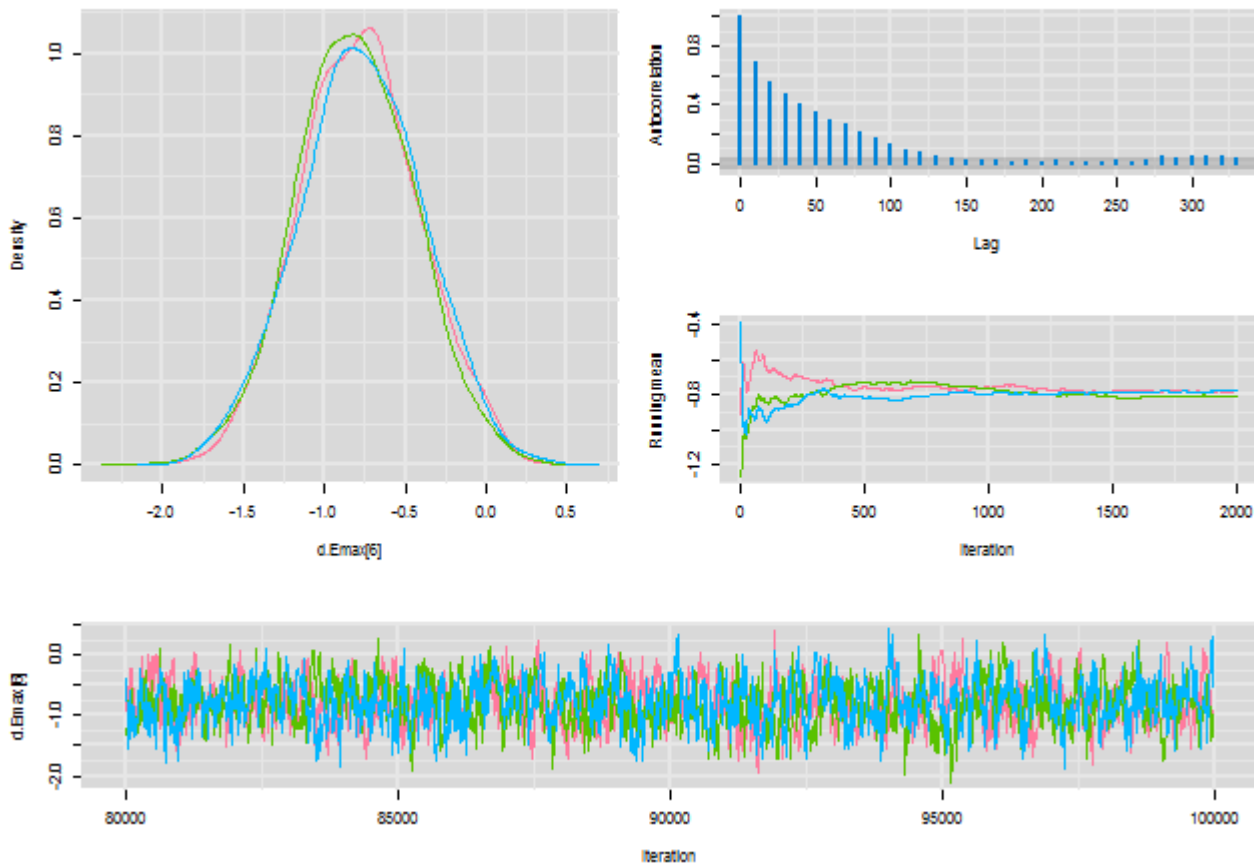

### Diagnostics for d.Emax[7]

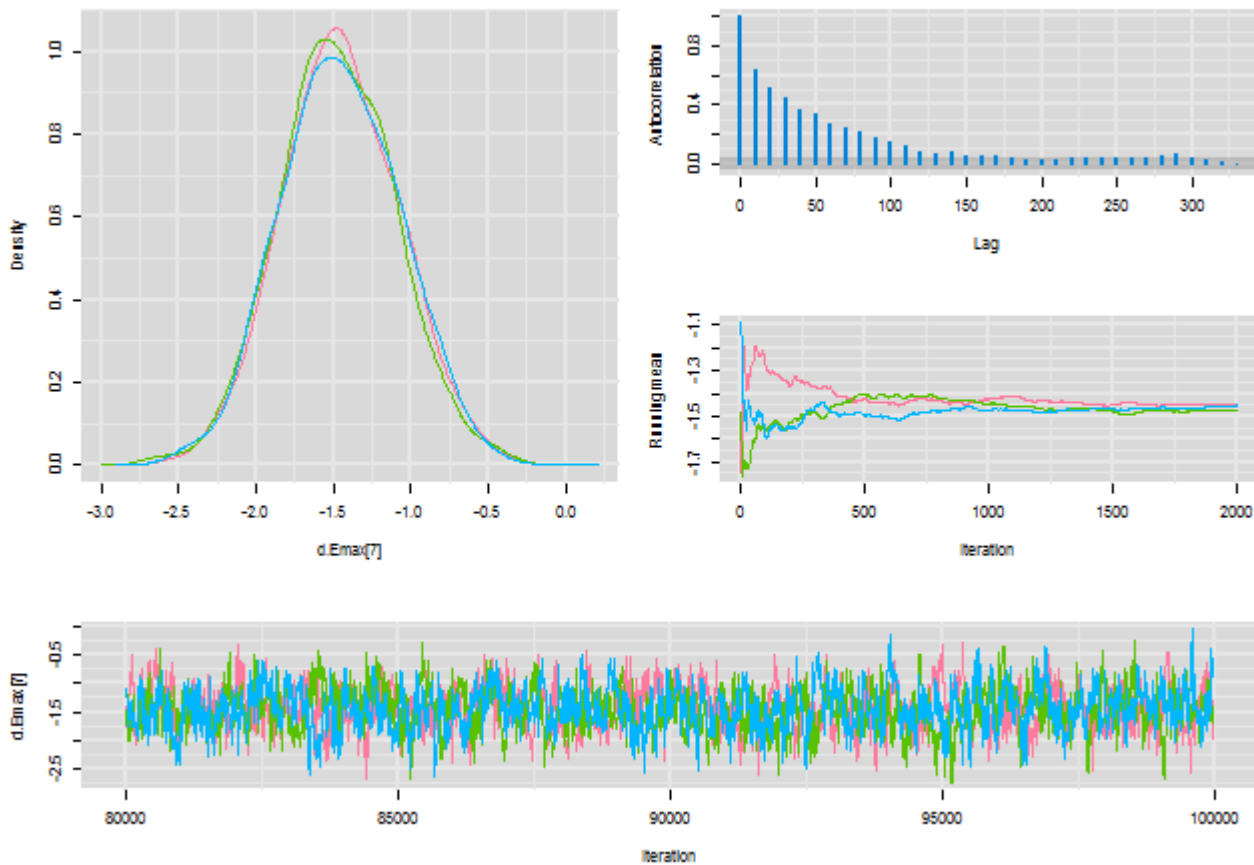

### Diagnostics for d.Emax[8]

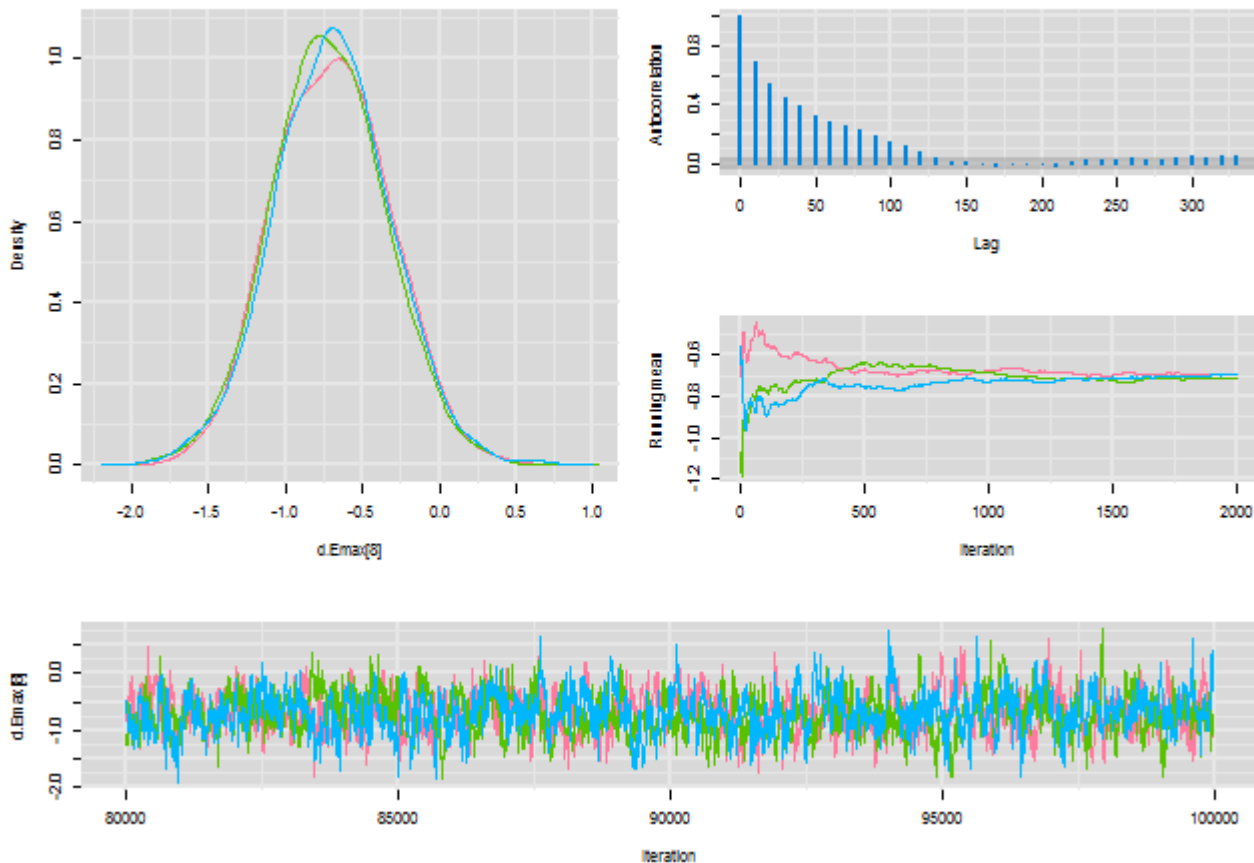

### Diagnostics for d.Emax[9]

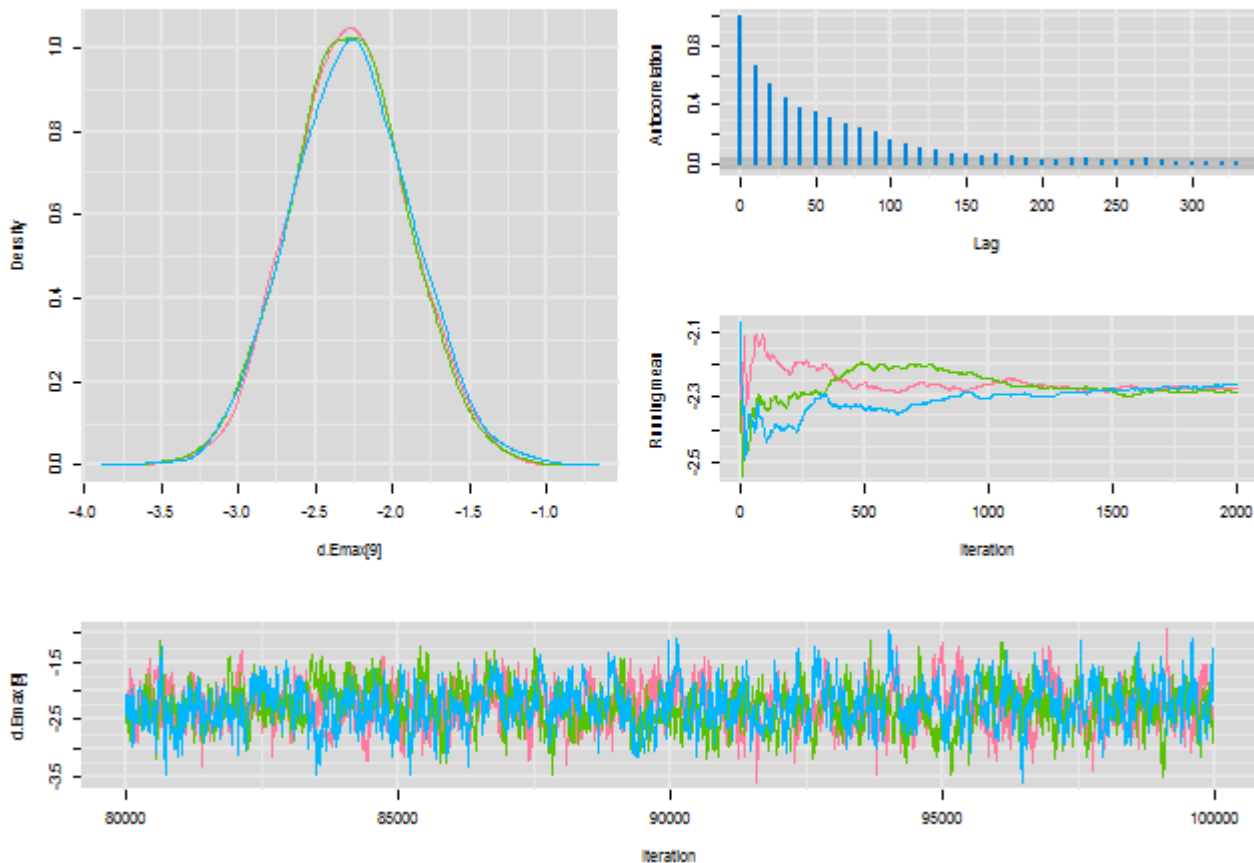

### Diagnostics for d.Emax[10]

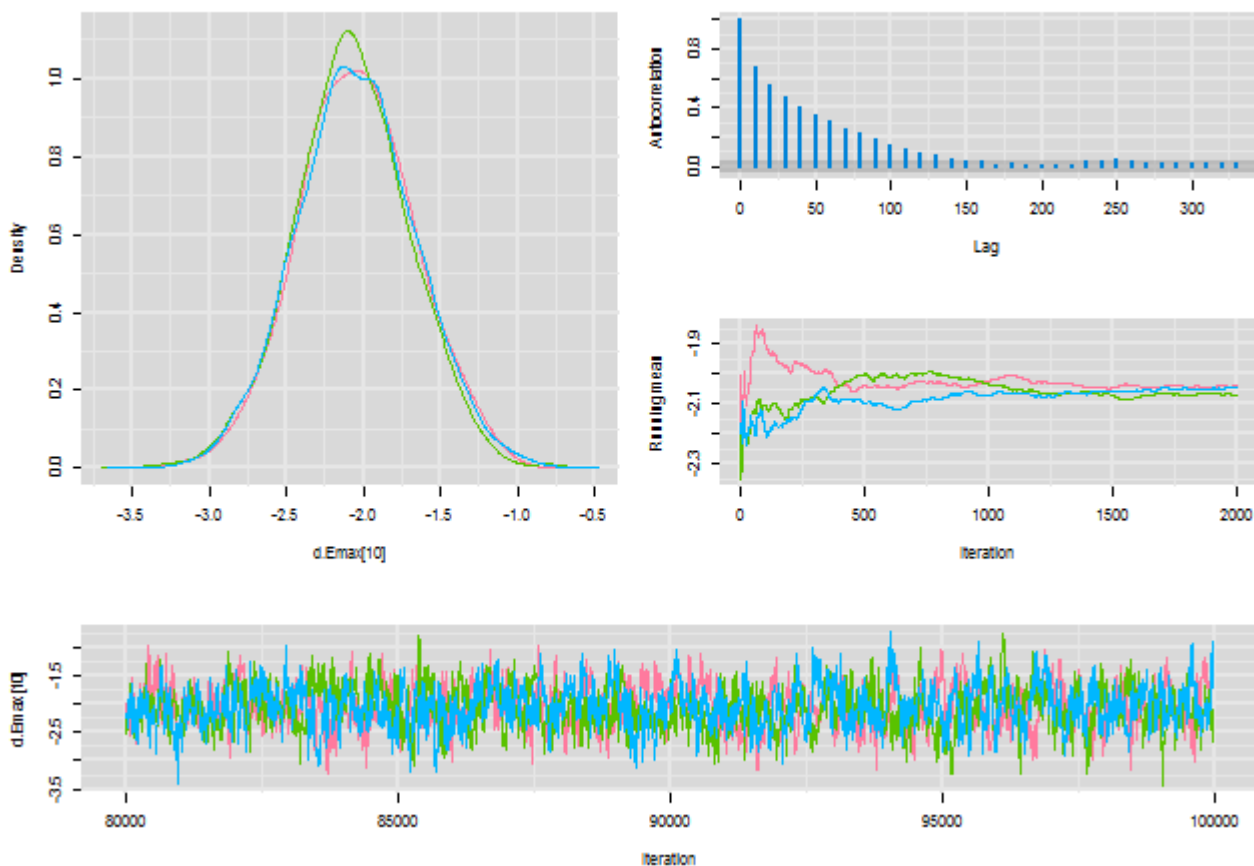

### Diagnostics for d.Emax[11]

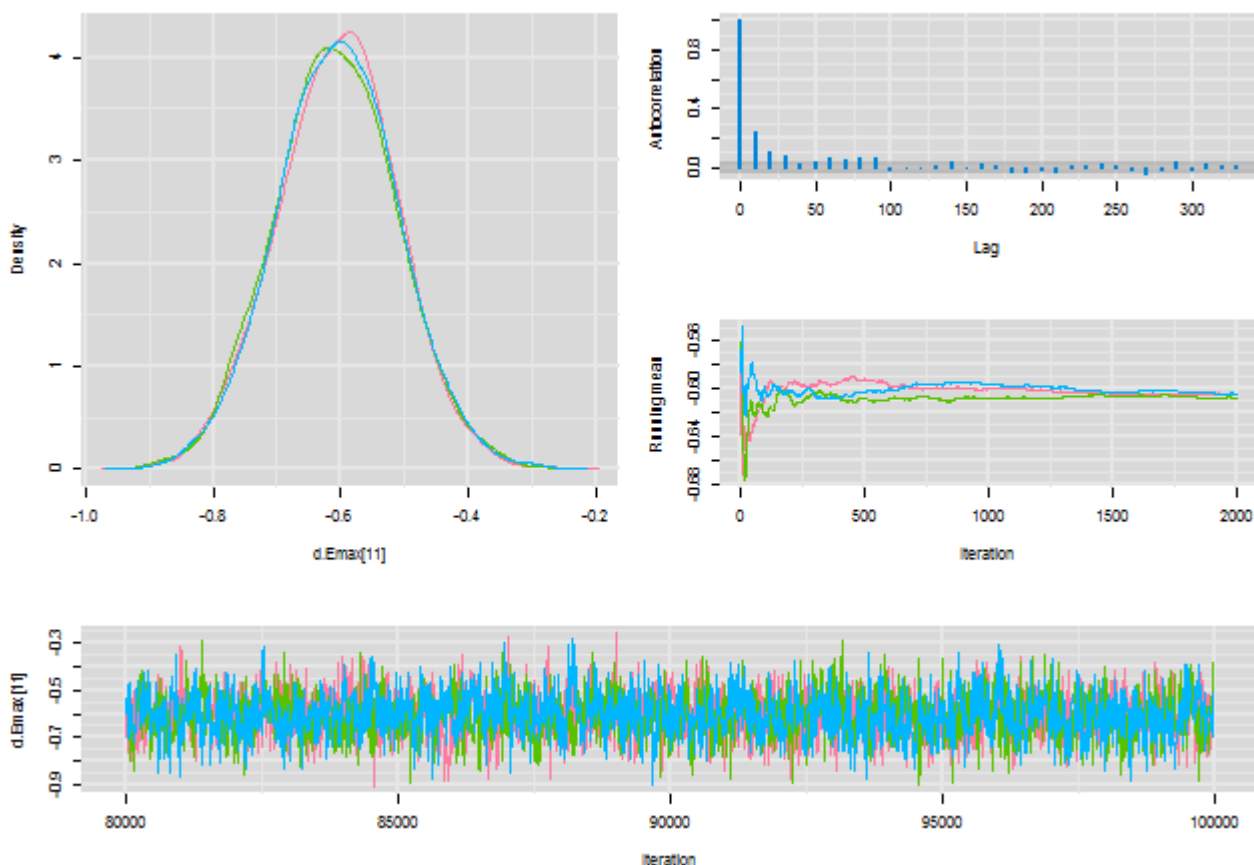

### Diagnostics for d.Emax[12]

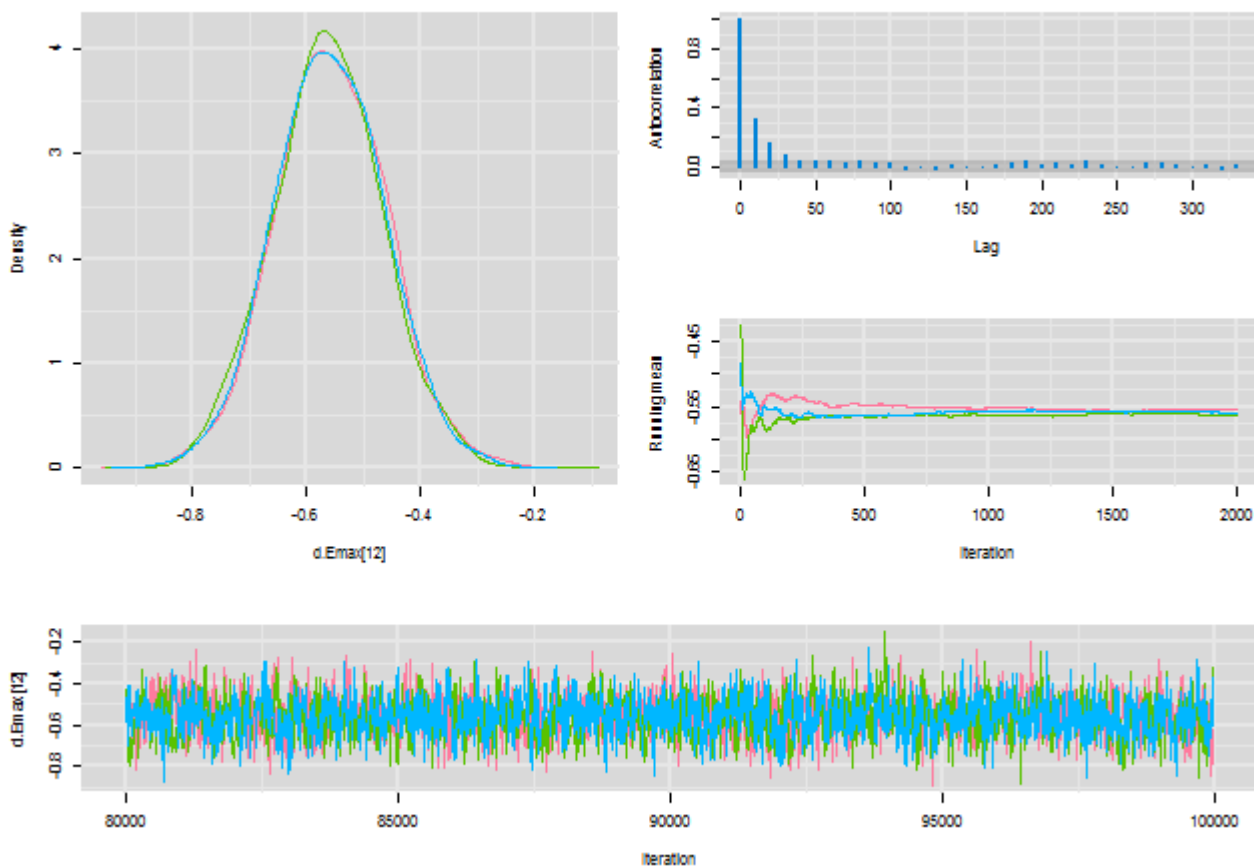

### Diagnostics for d.Emax[13]

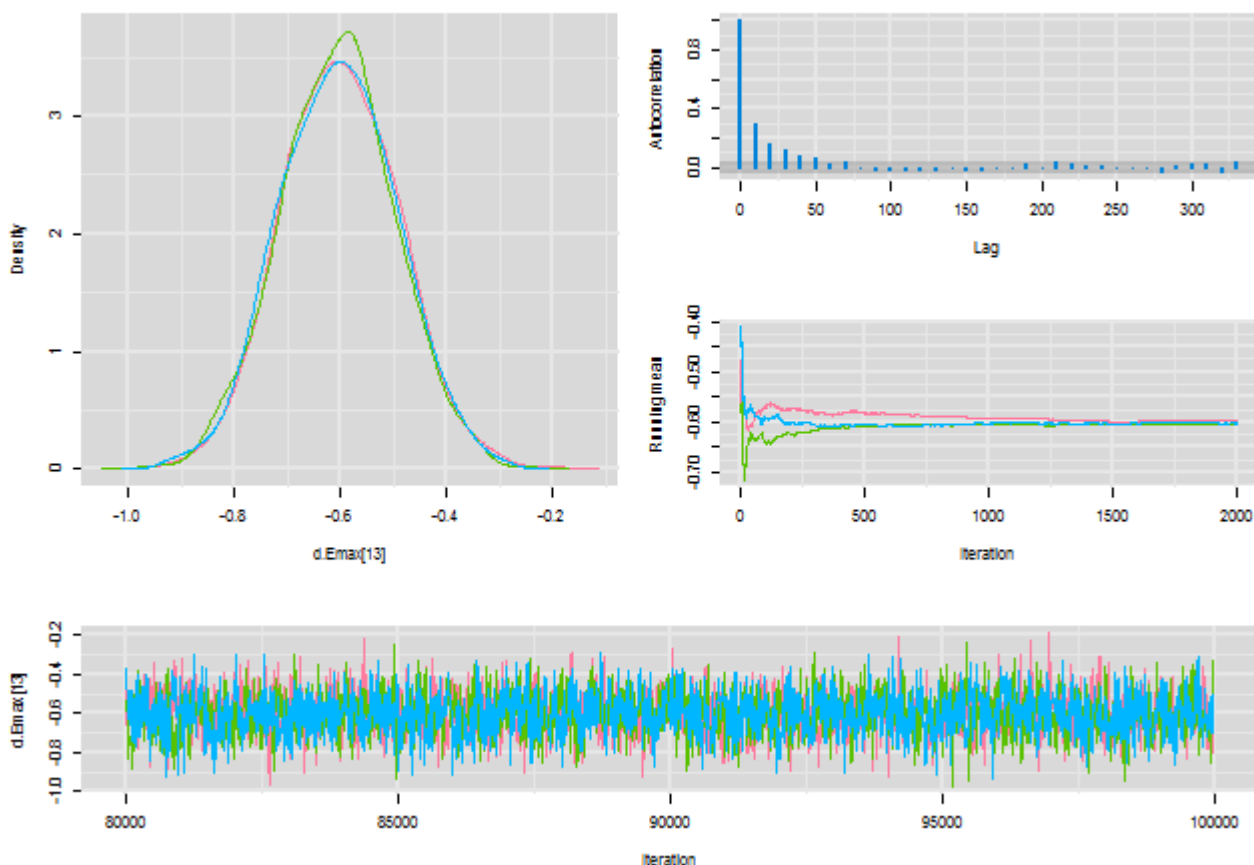

### Diagnostics for d.Emax[14]

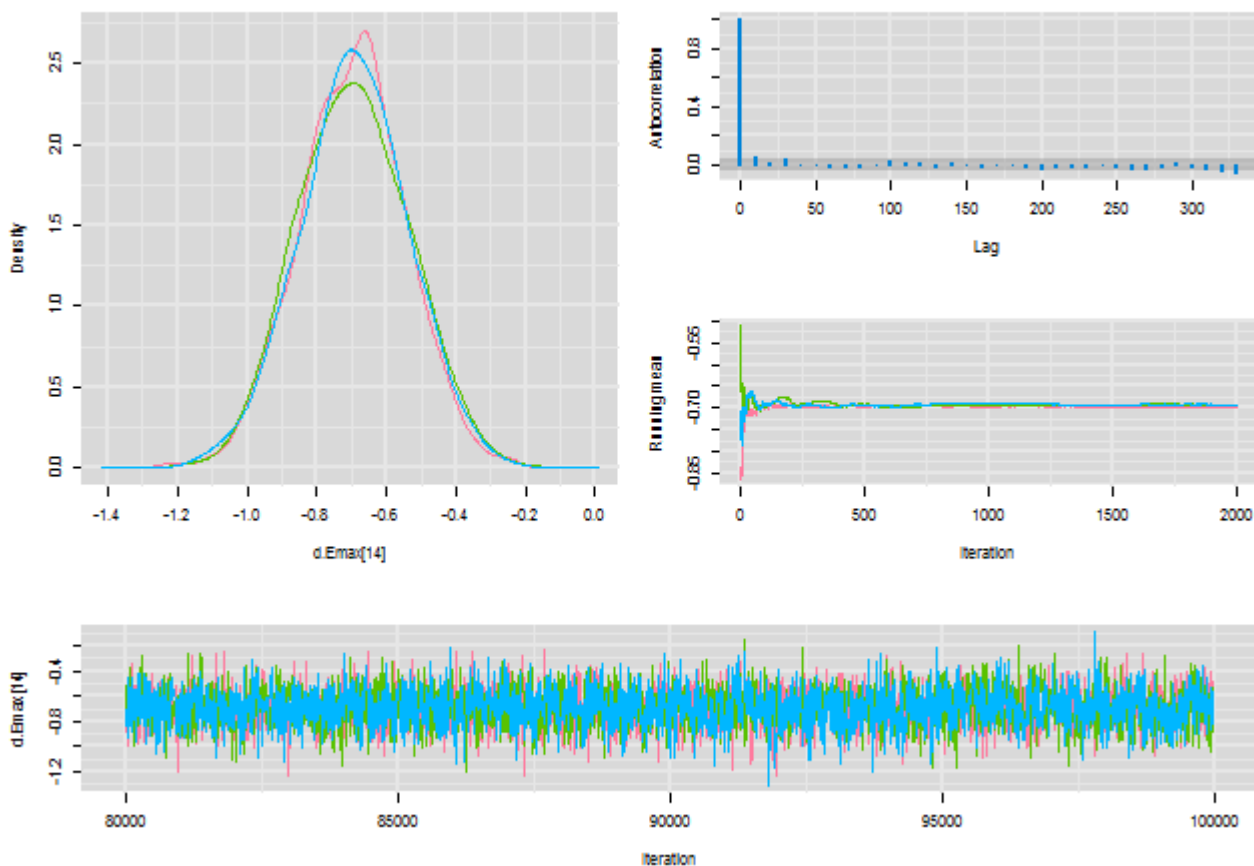

### Diagnostics for d.Emax[15]

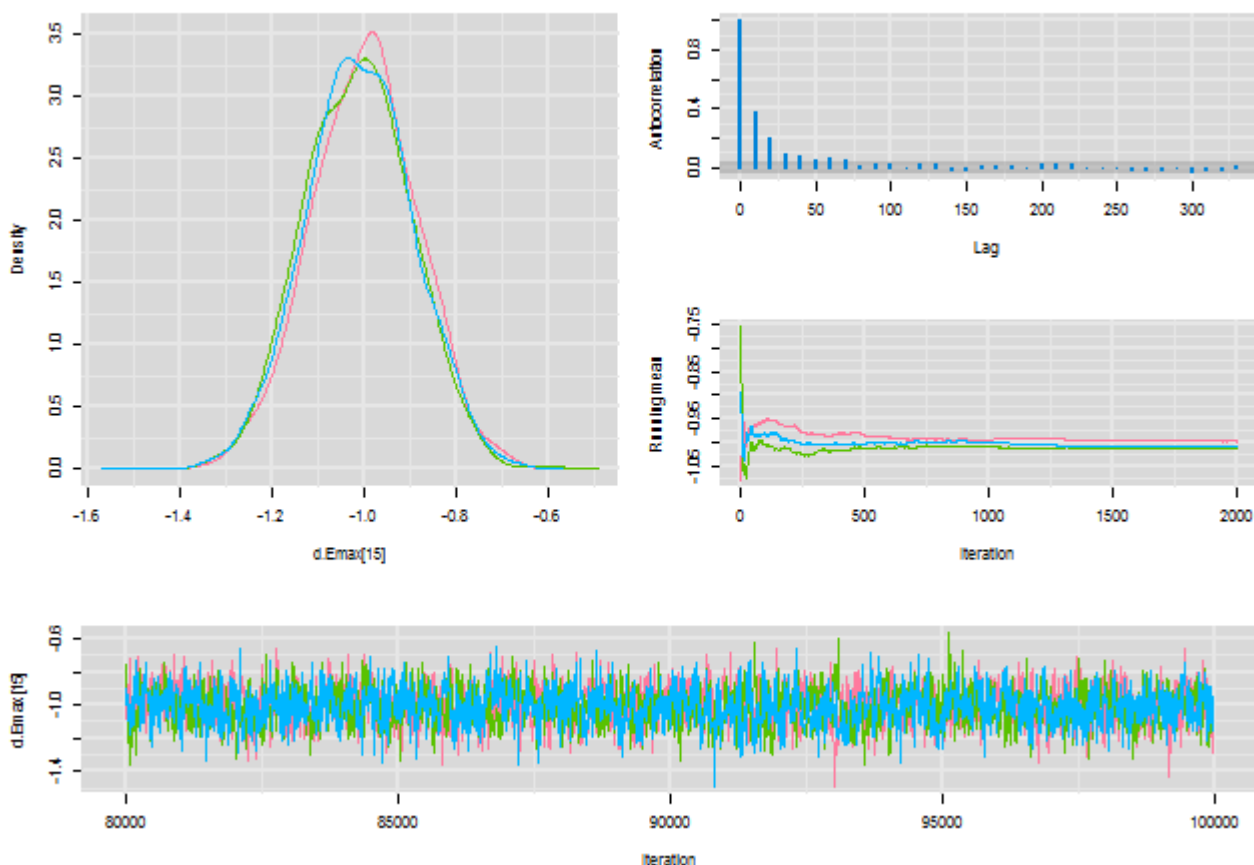



### Diagnostics for d.Emax[16]

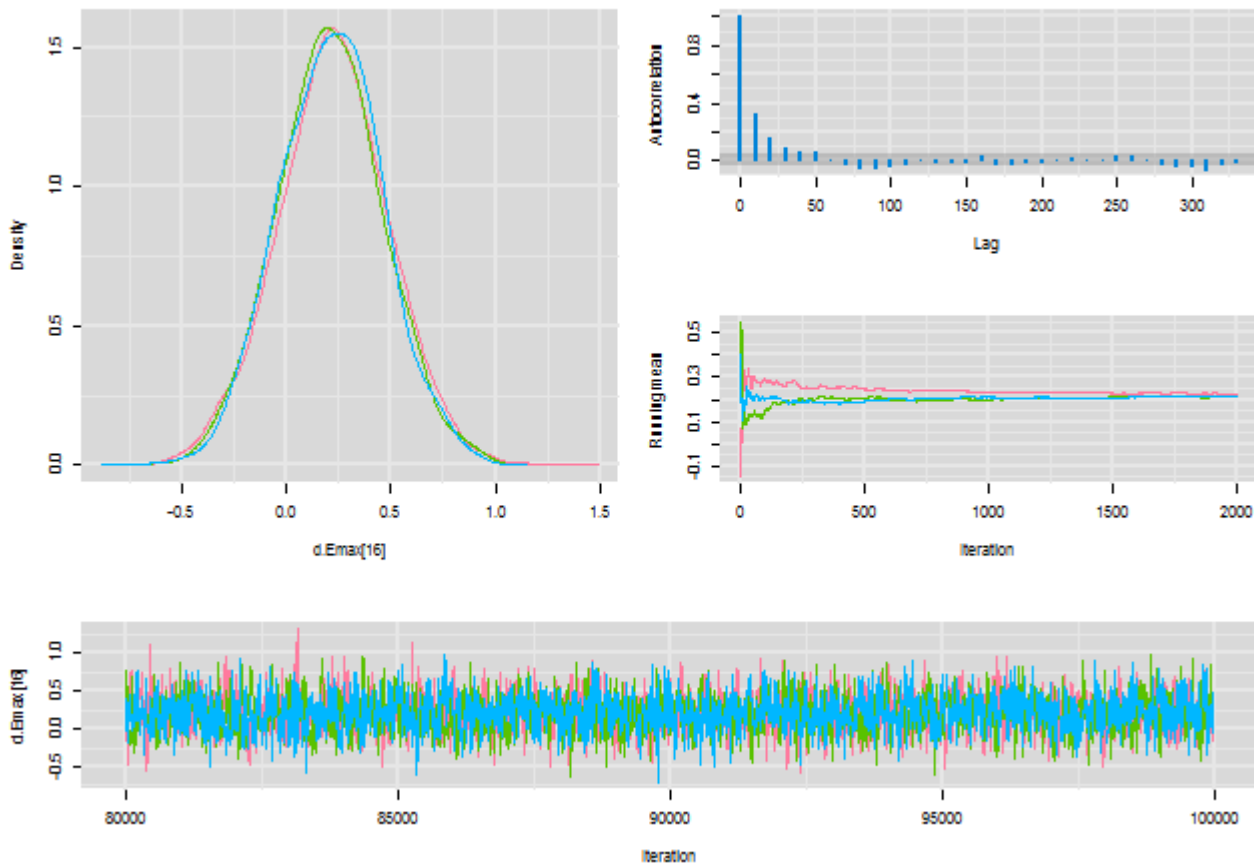

### Diagnostics for d.Emax[17]

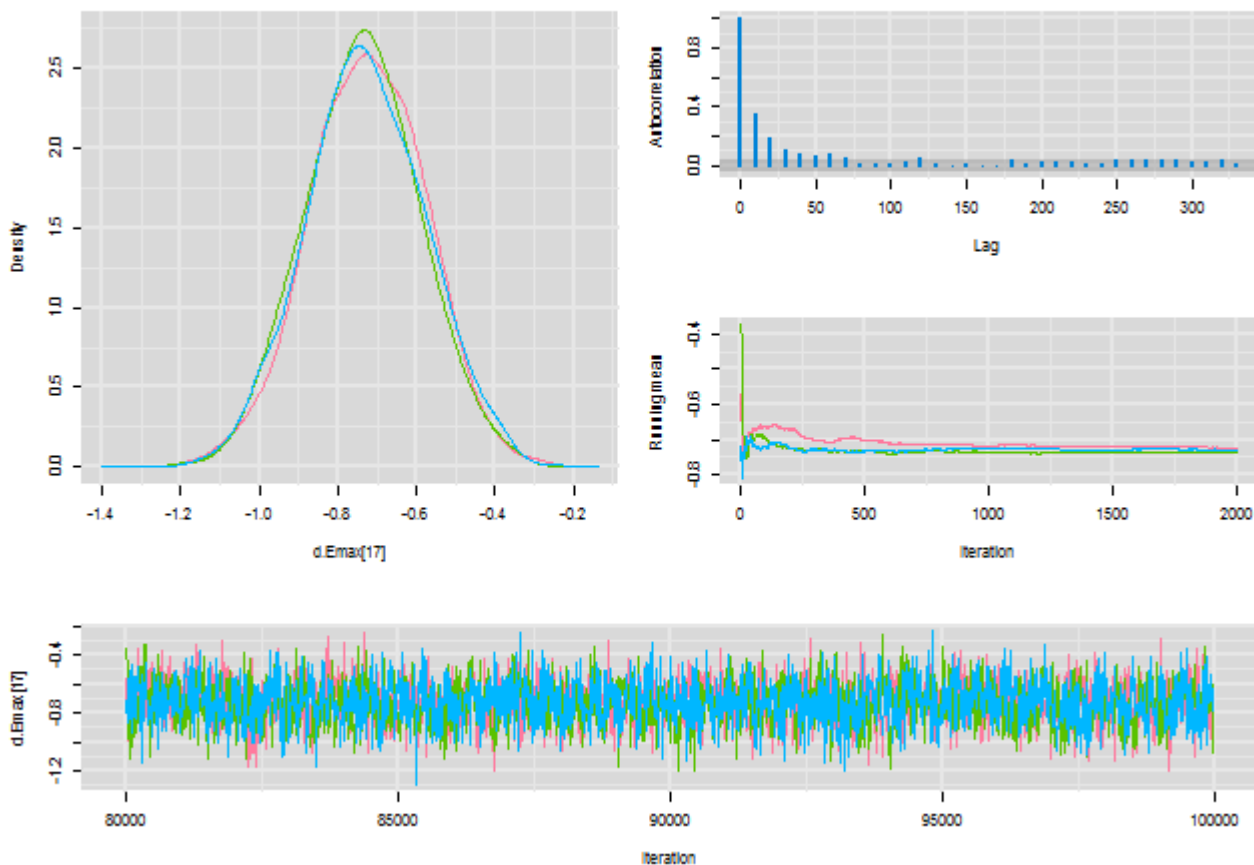

### Diagnostics for d.Emax[18]

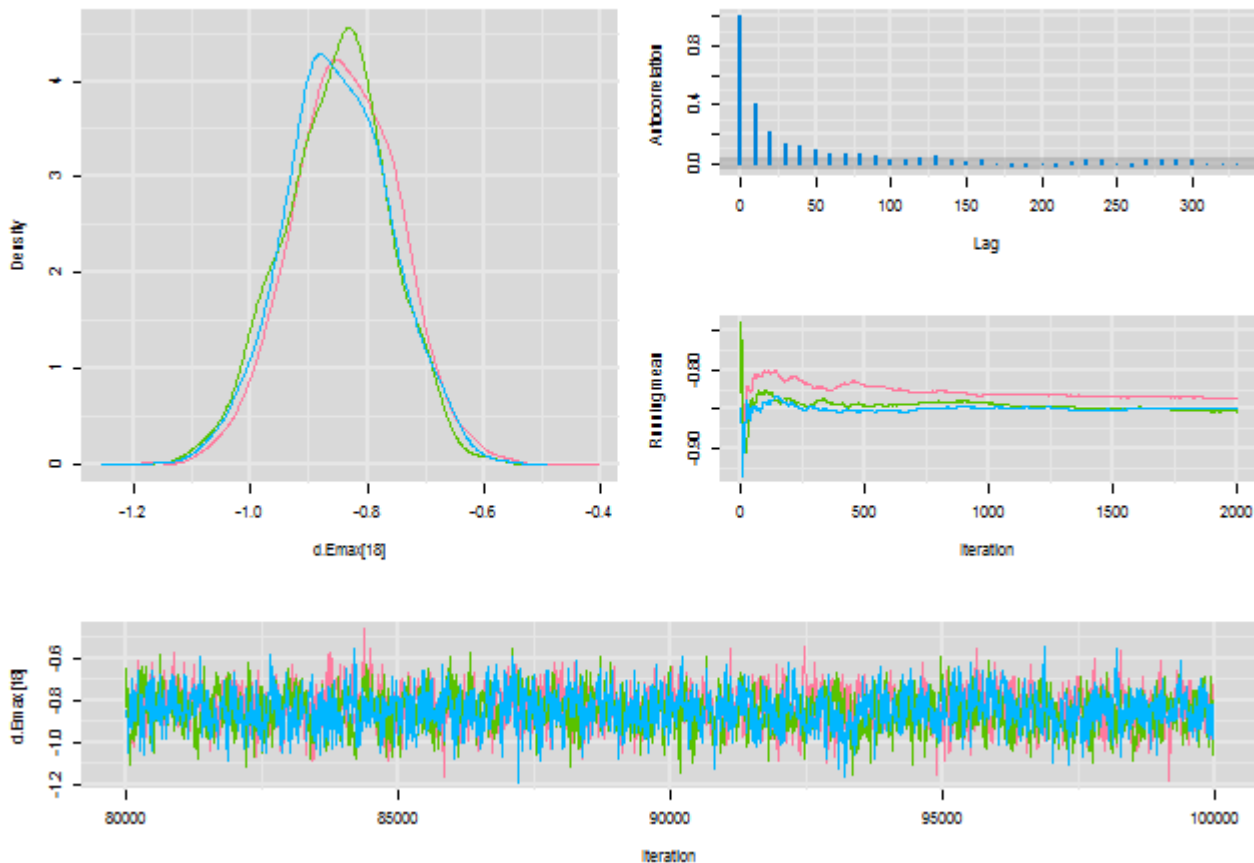

### Diagnostics for d.Emax[19]

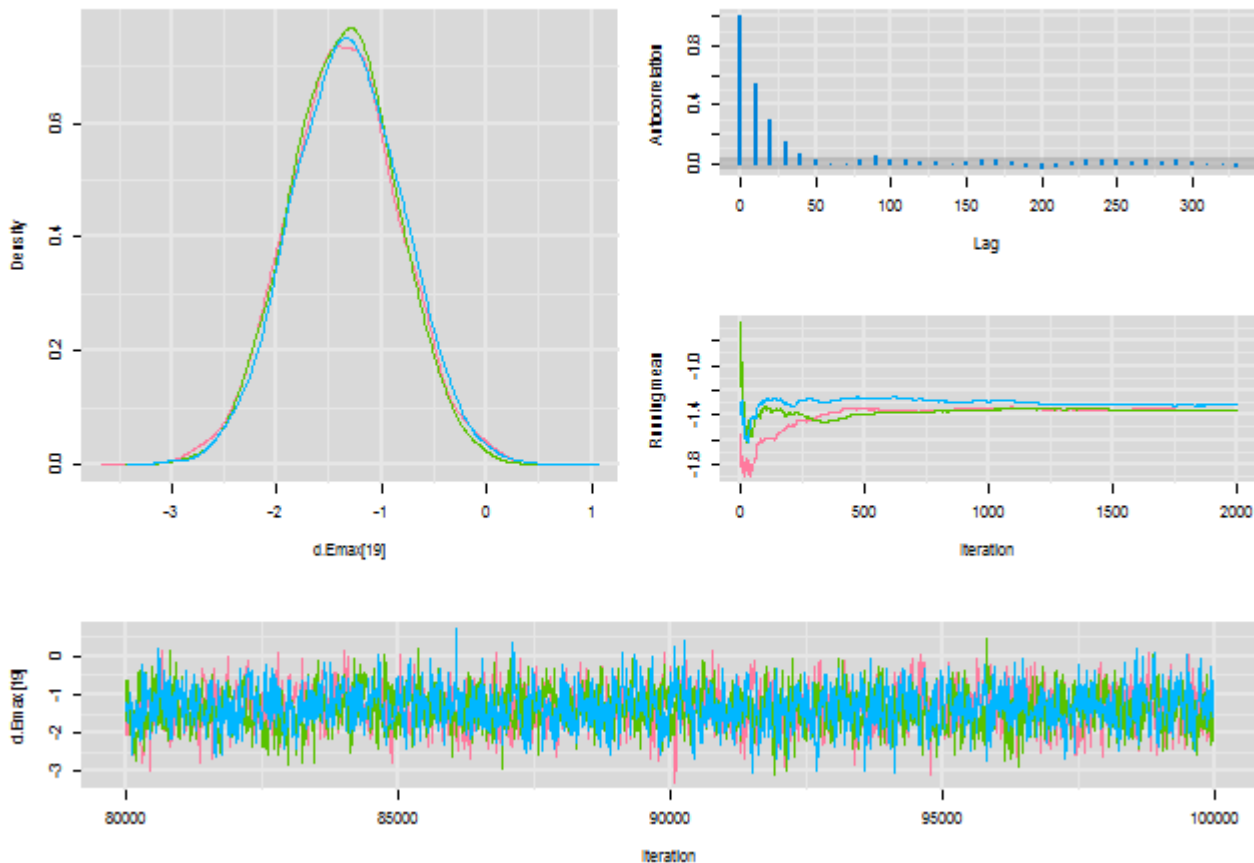

### Diagnostics for d.Emax[20]

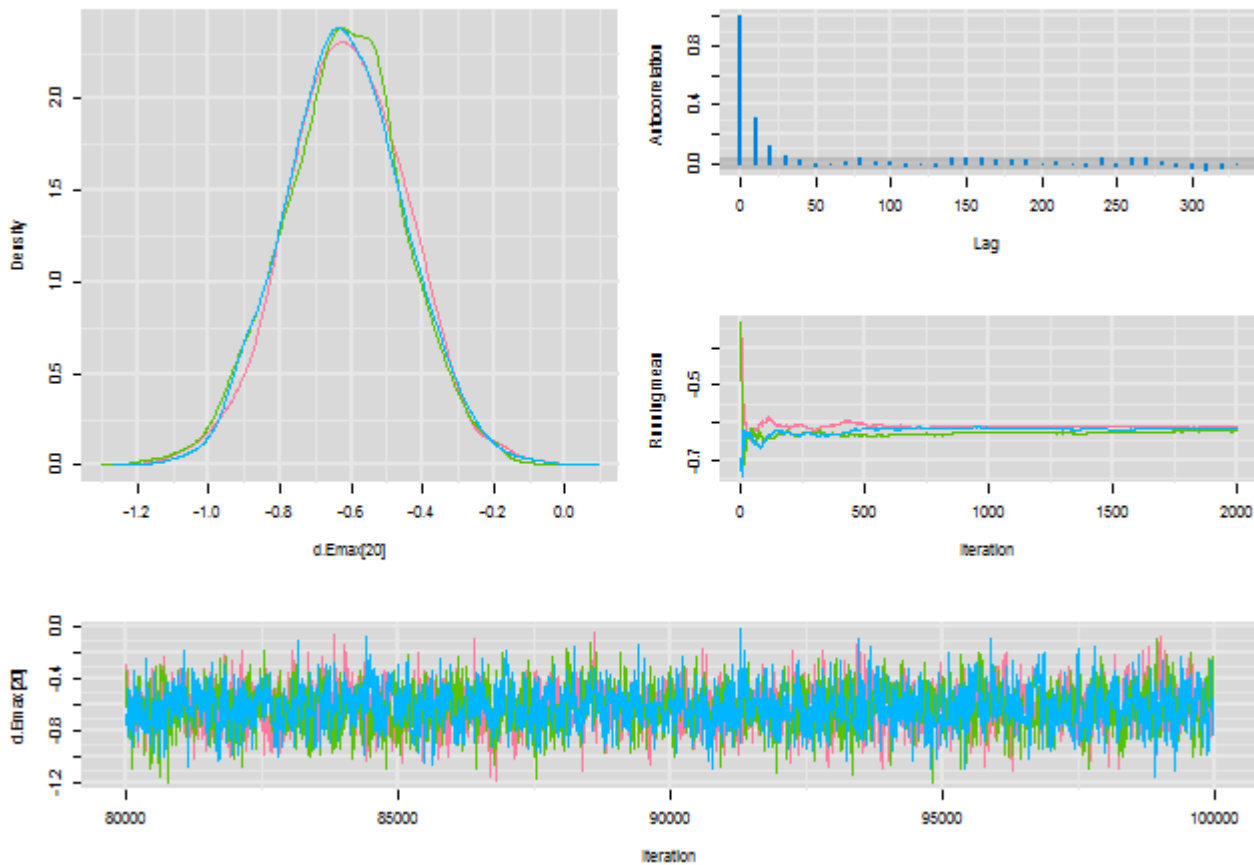

### Diagnostics for d.Emax[21]

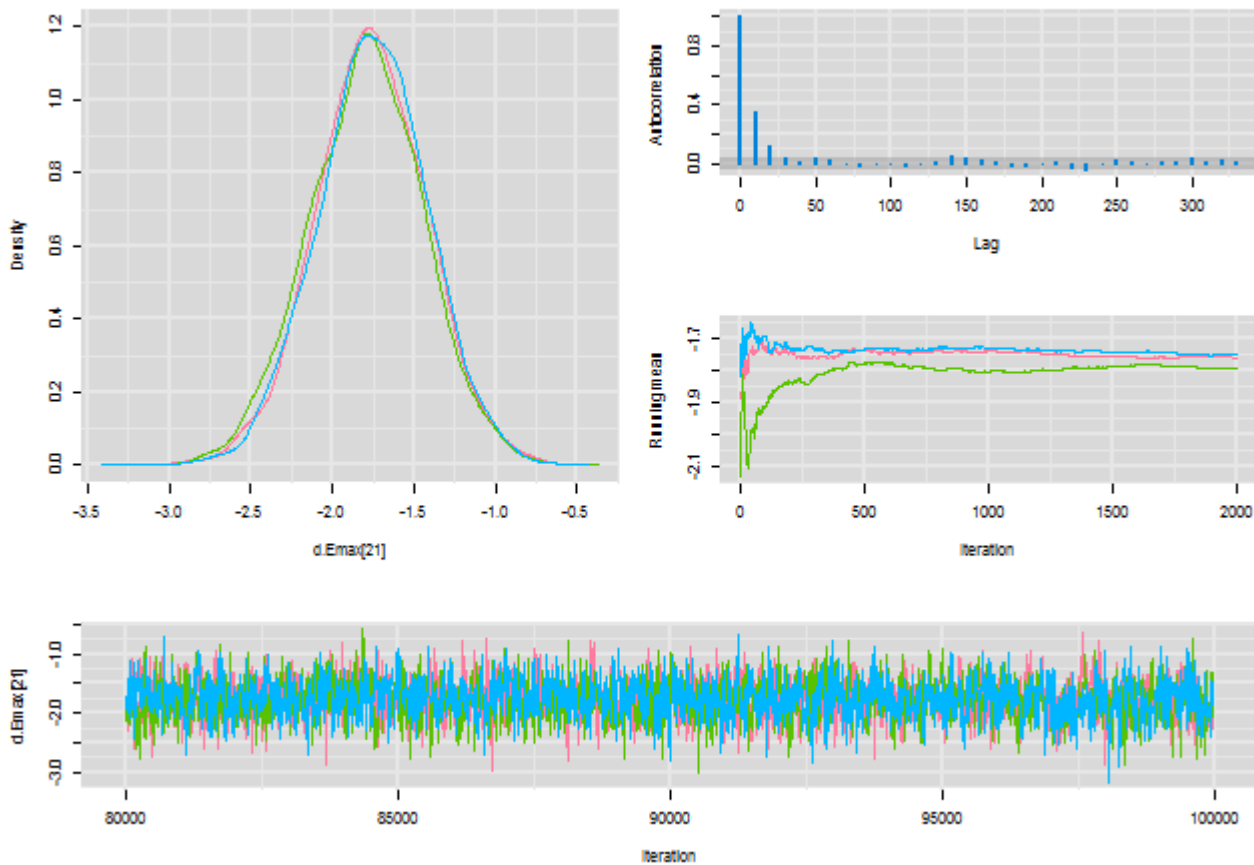

### Diagnostics for d.Emax[22]

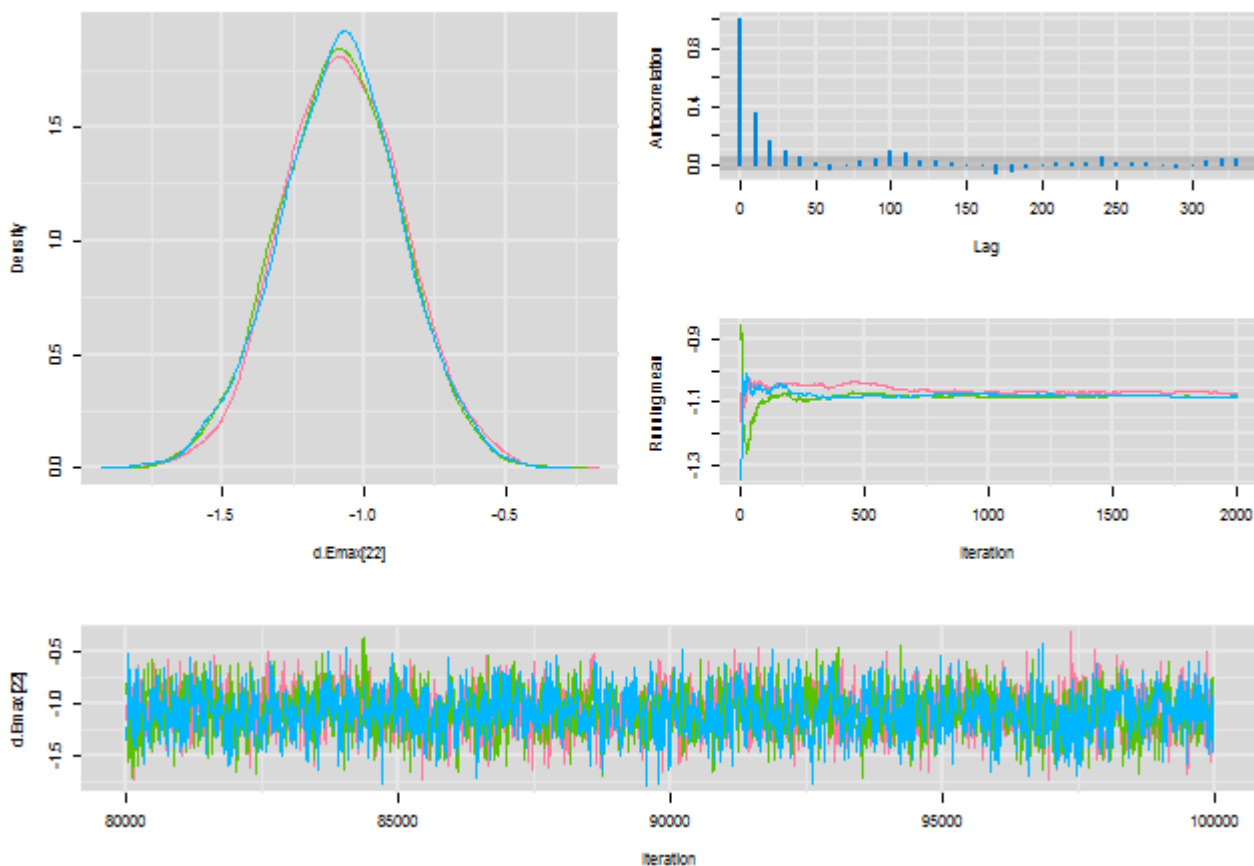

### Diagnostics for d.Emax[23]

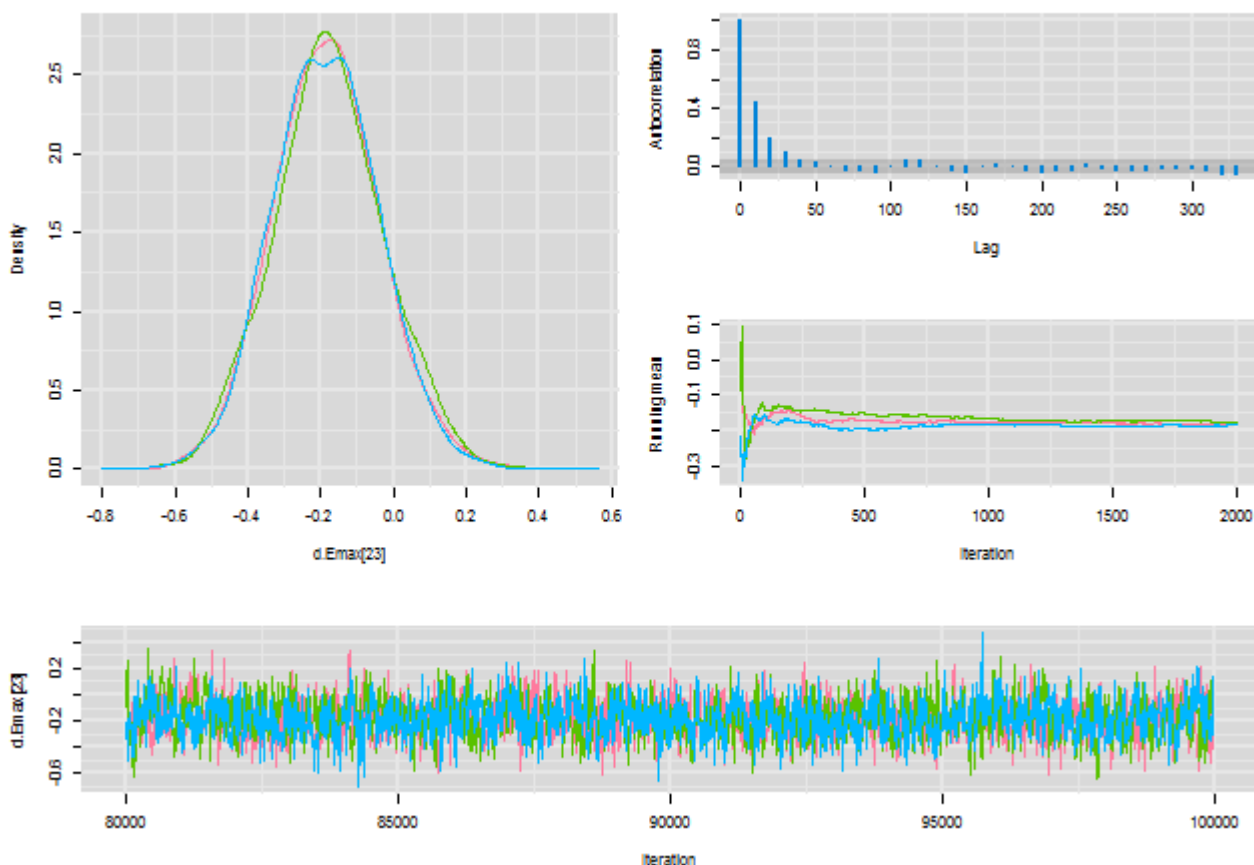

### Diagnostics for d.Emax[24]

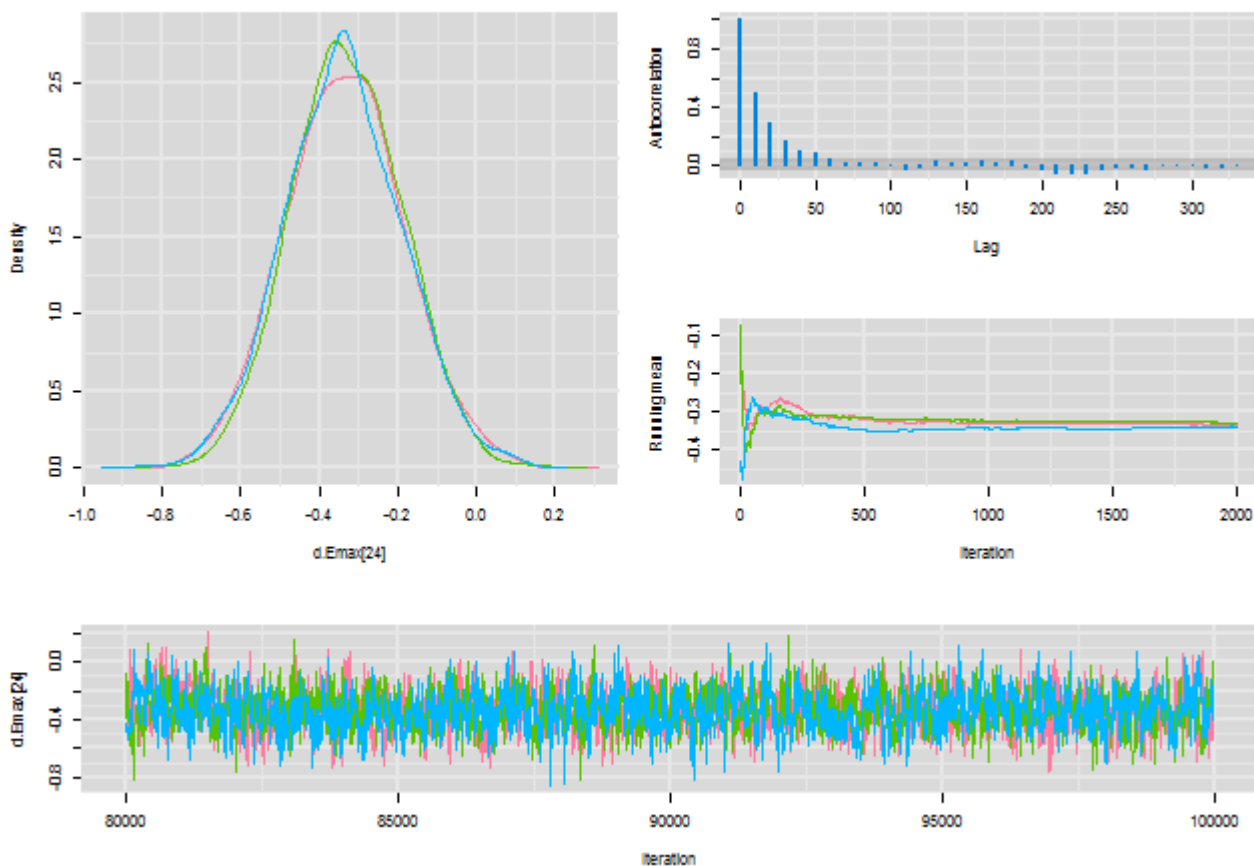

### Diagnostics for d.Emax[25]

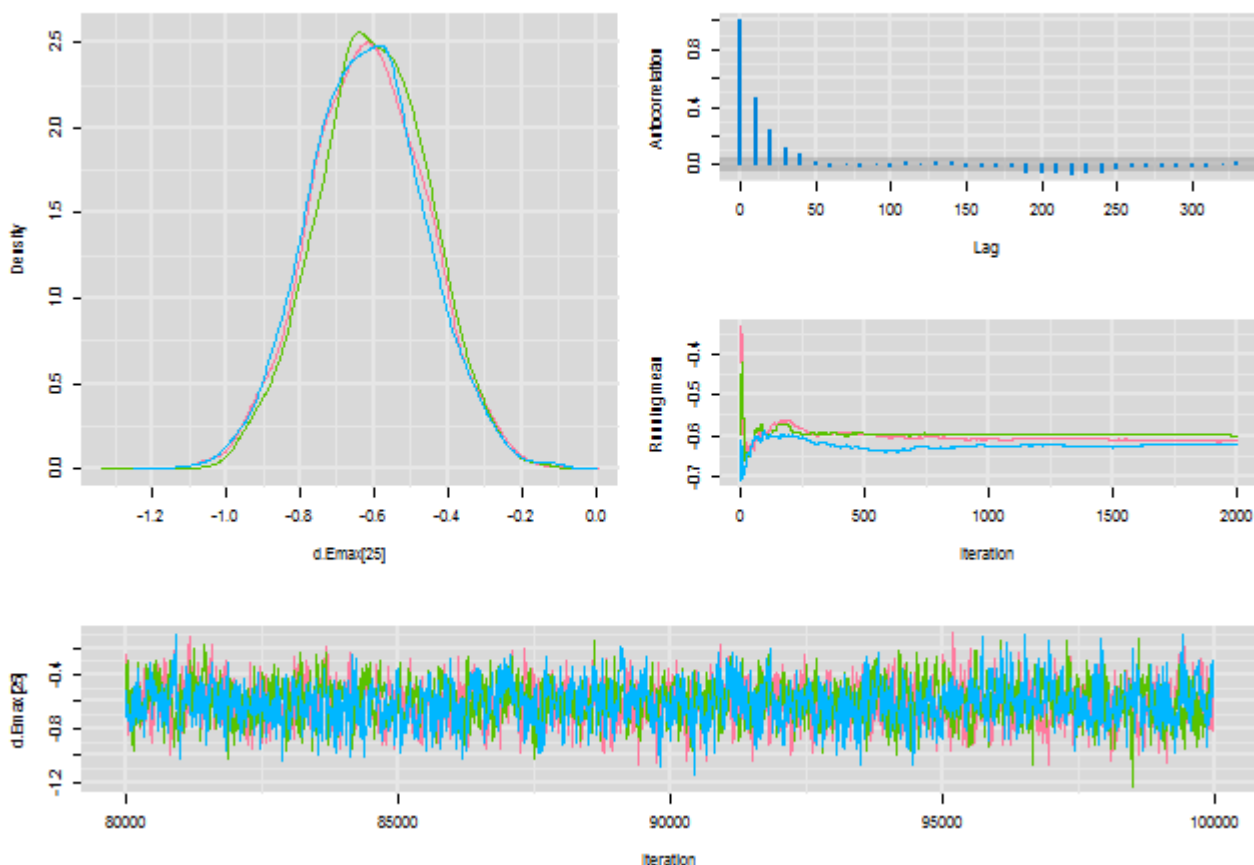

### Diagnostics for d.Emax[26]

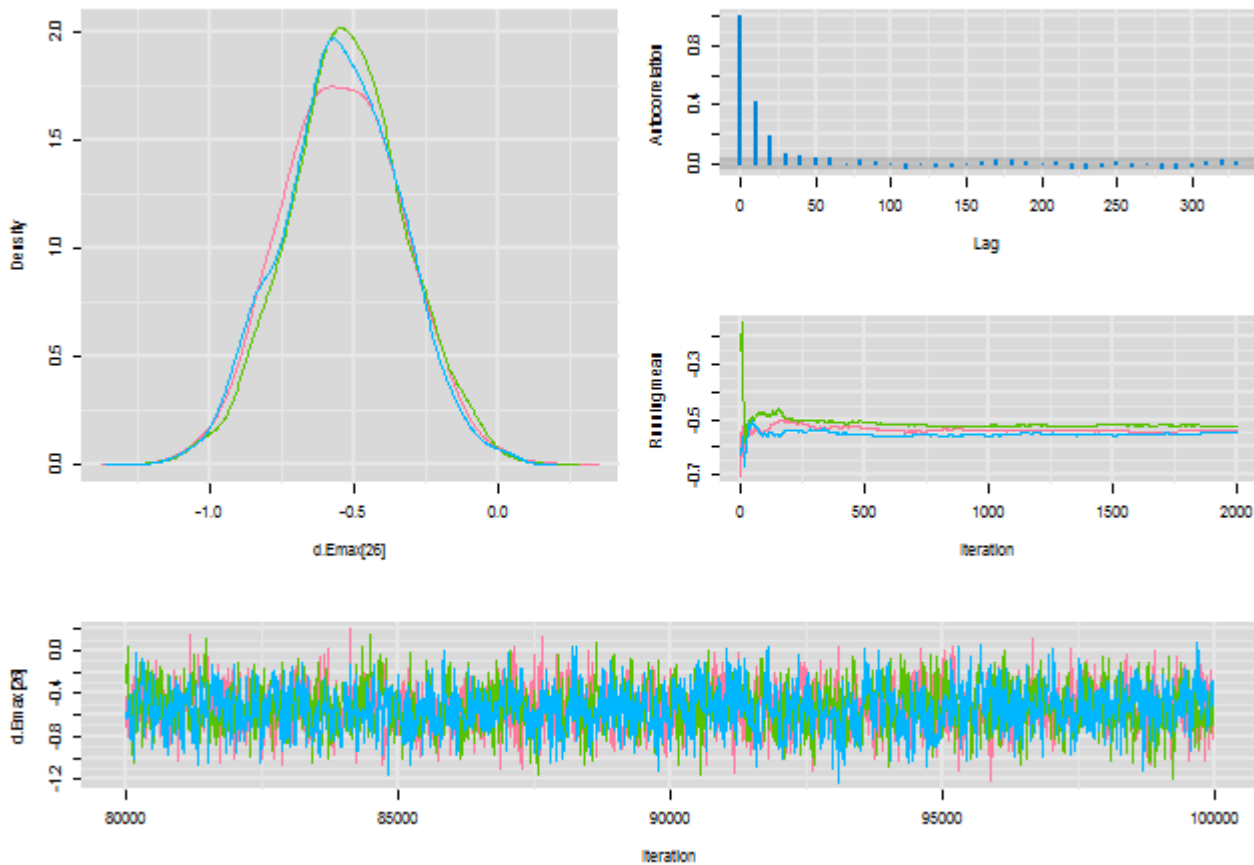

### Diagnostics for d.Emax[27]

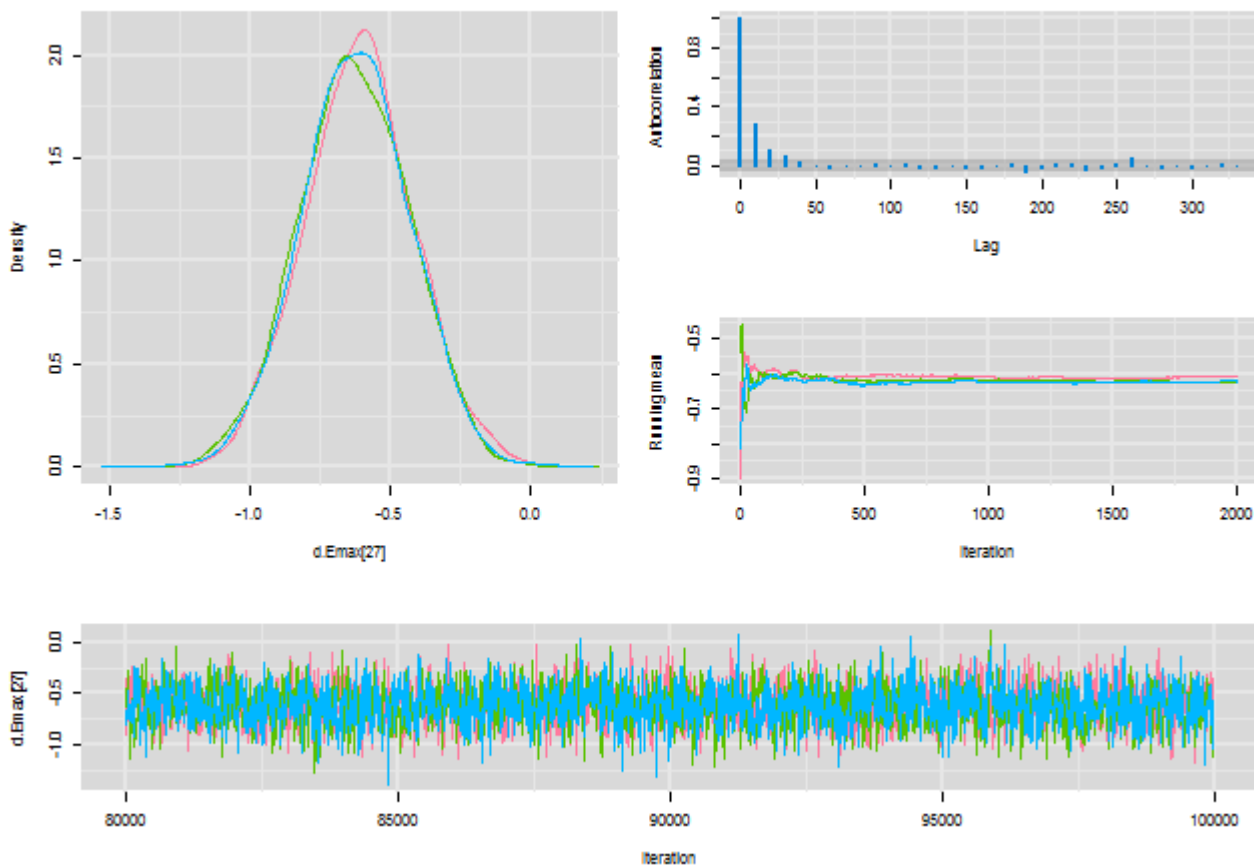

### Diagnostics for d.Emax[28]

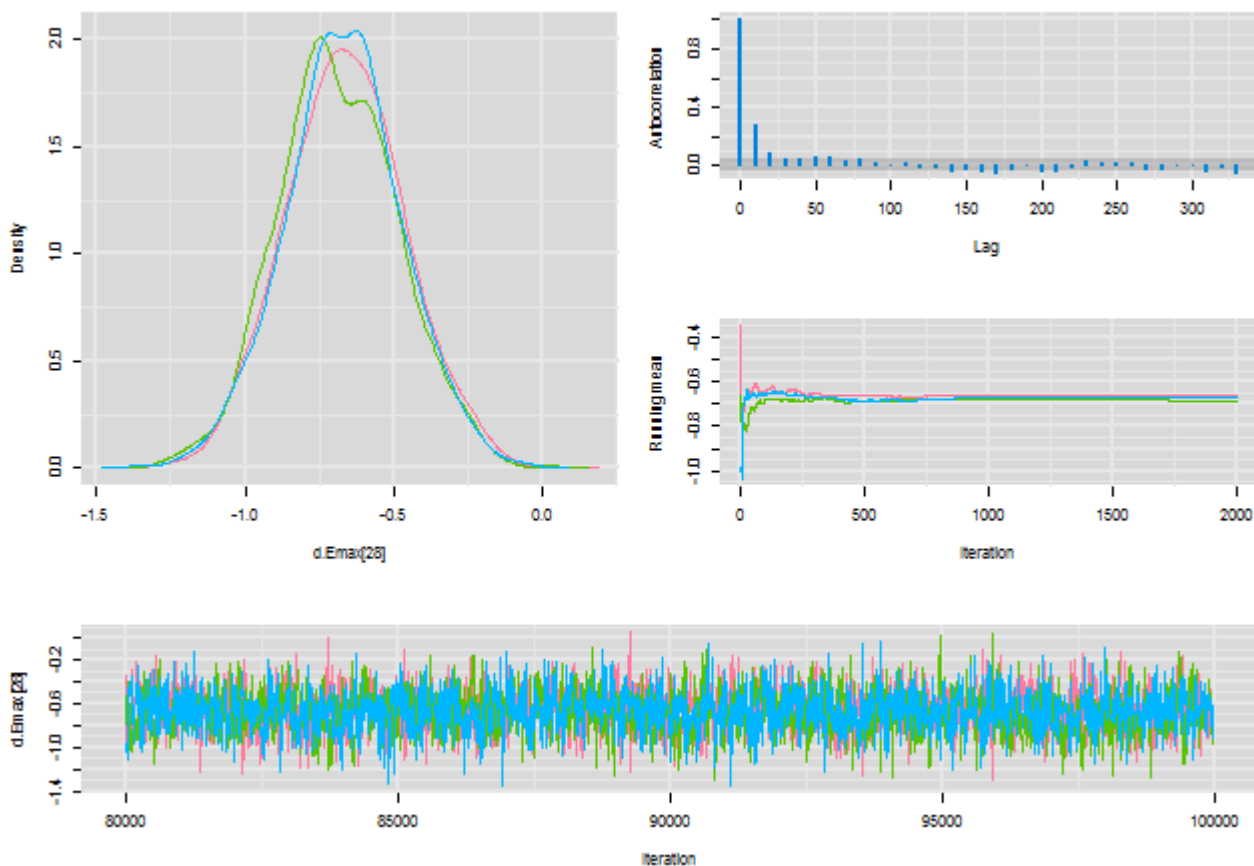

### Diagnostics for d.Emax[29]

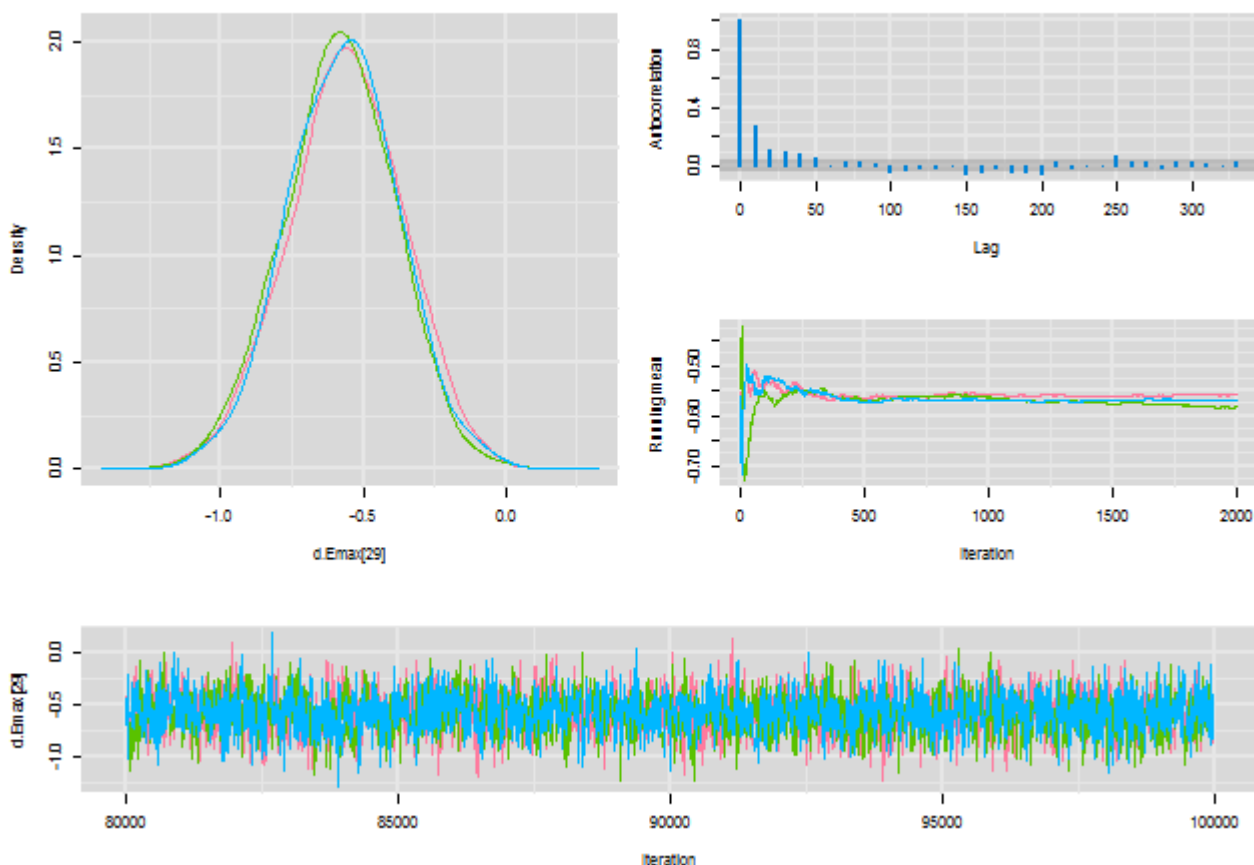

# Plots for m.ET50

### Diagnostics for m.ET50

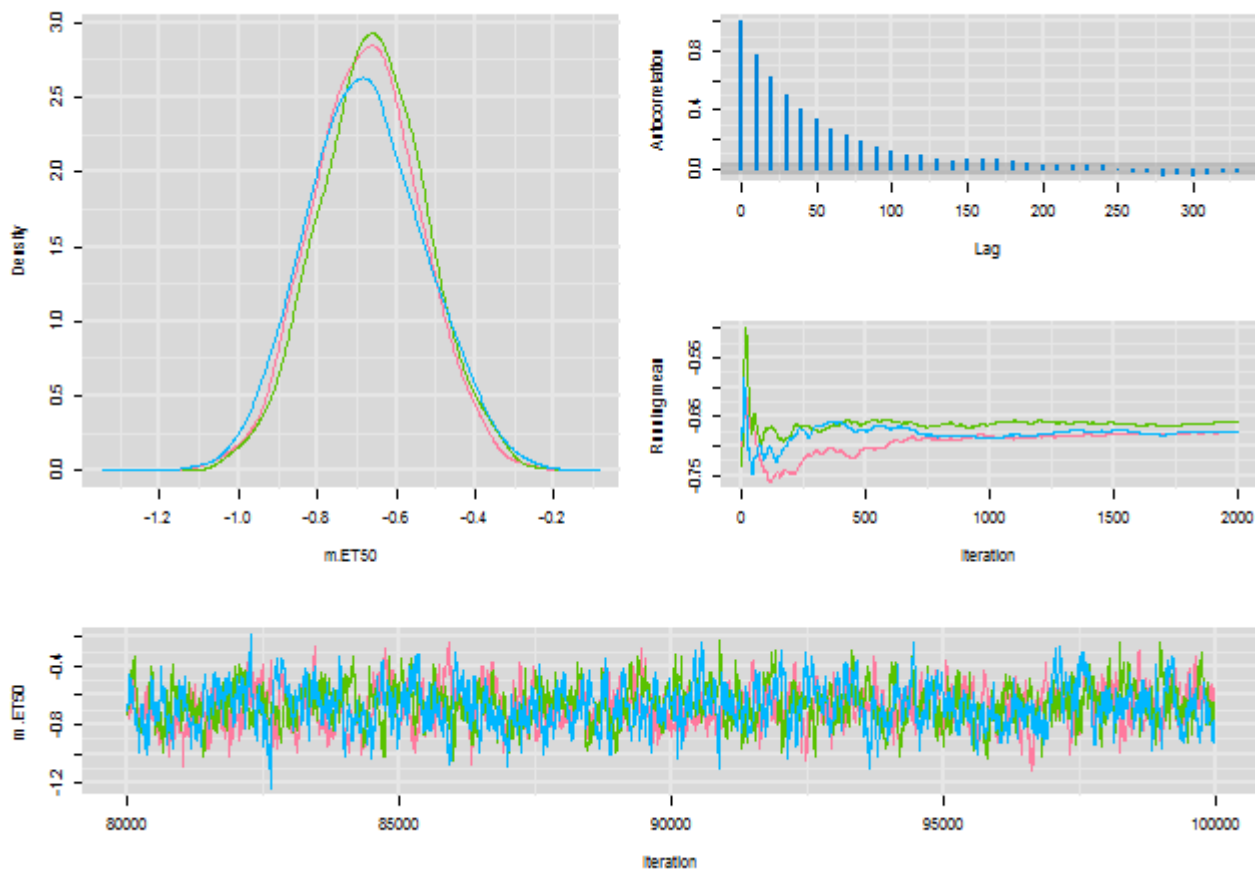



# Plots for m.mu

Diagnostics for m.mu

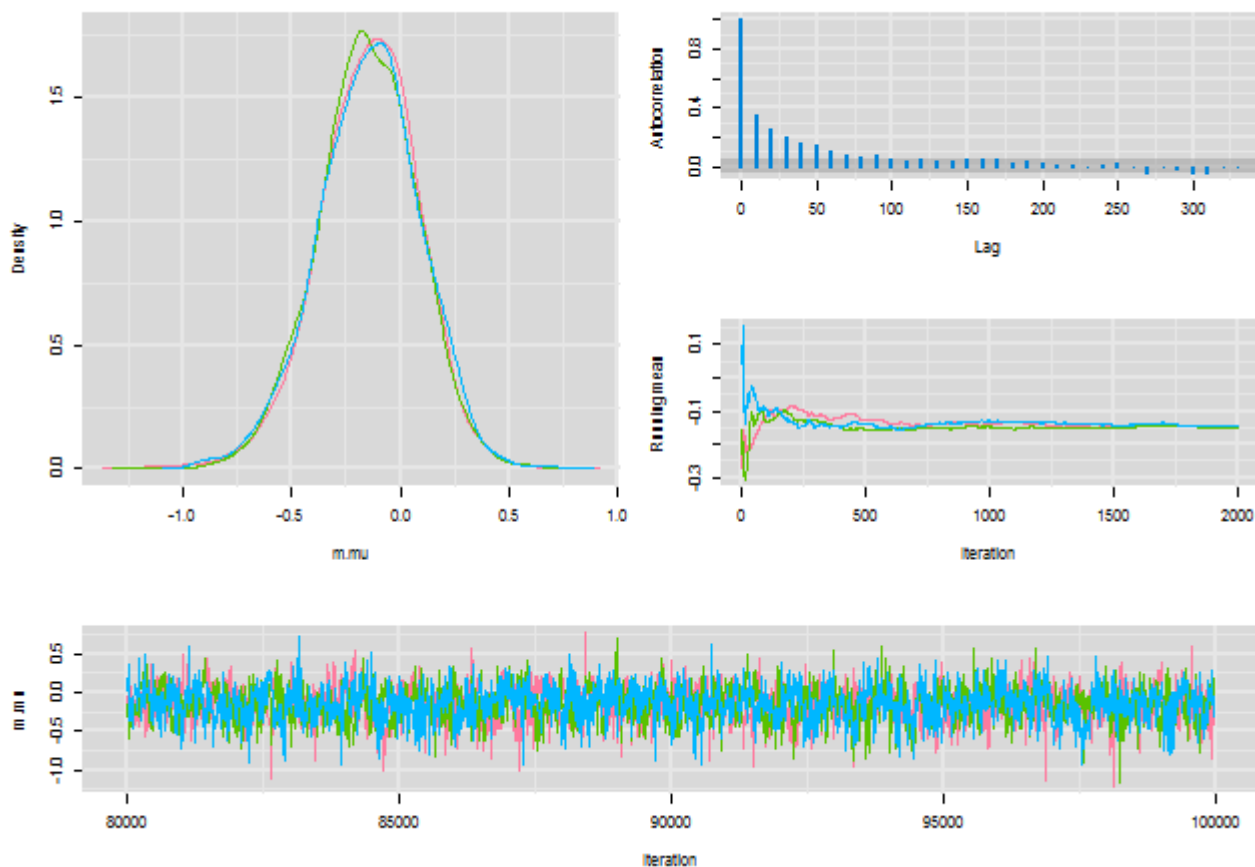

# Plots for sd.mu

Diagnostics for sd.mu

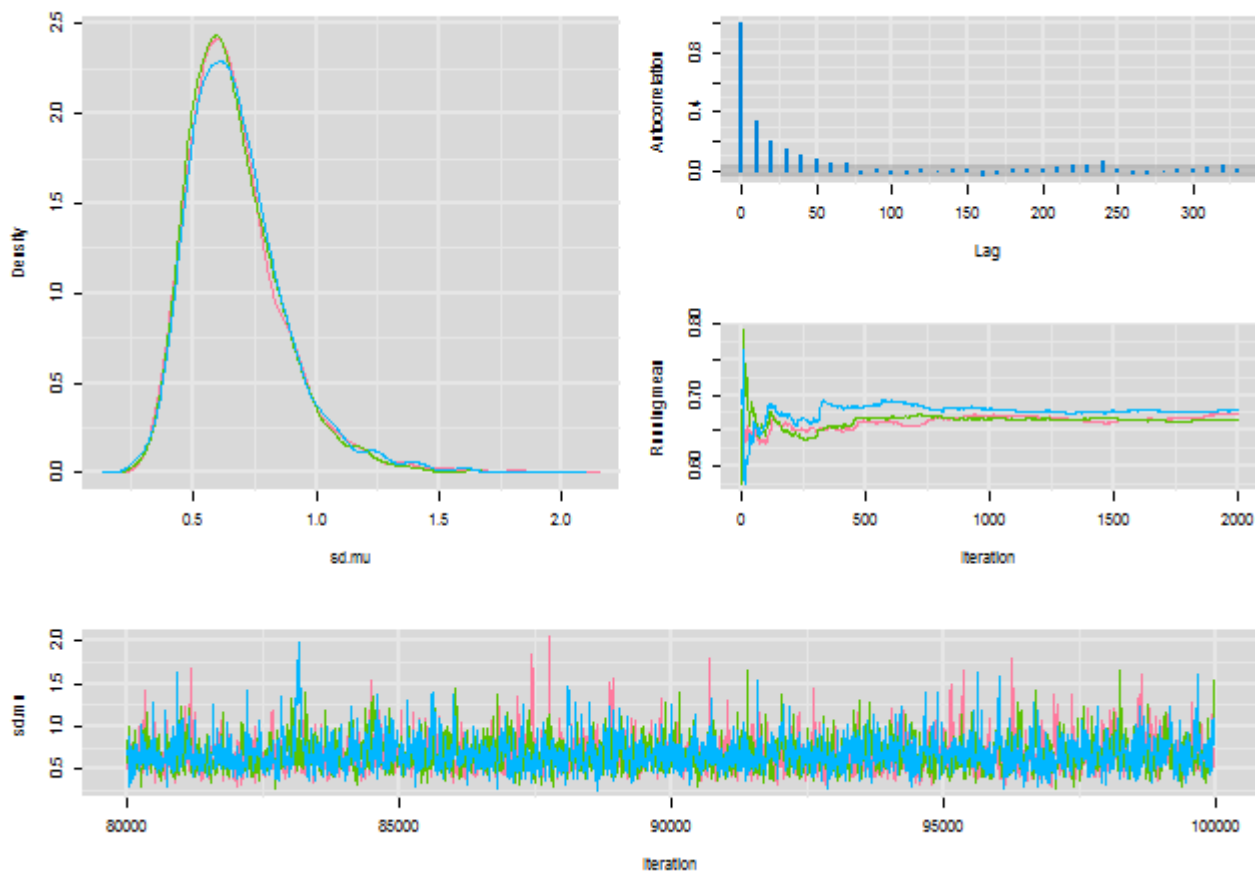

# Plots for deviance

Diagnostics for deviance

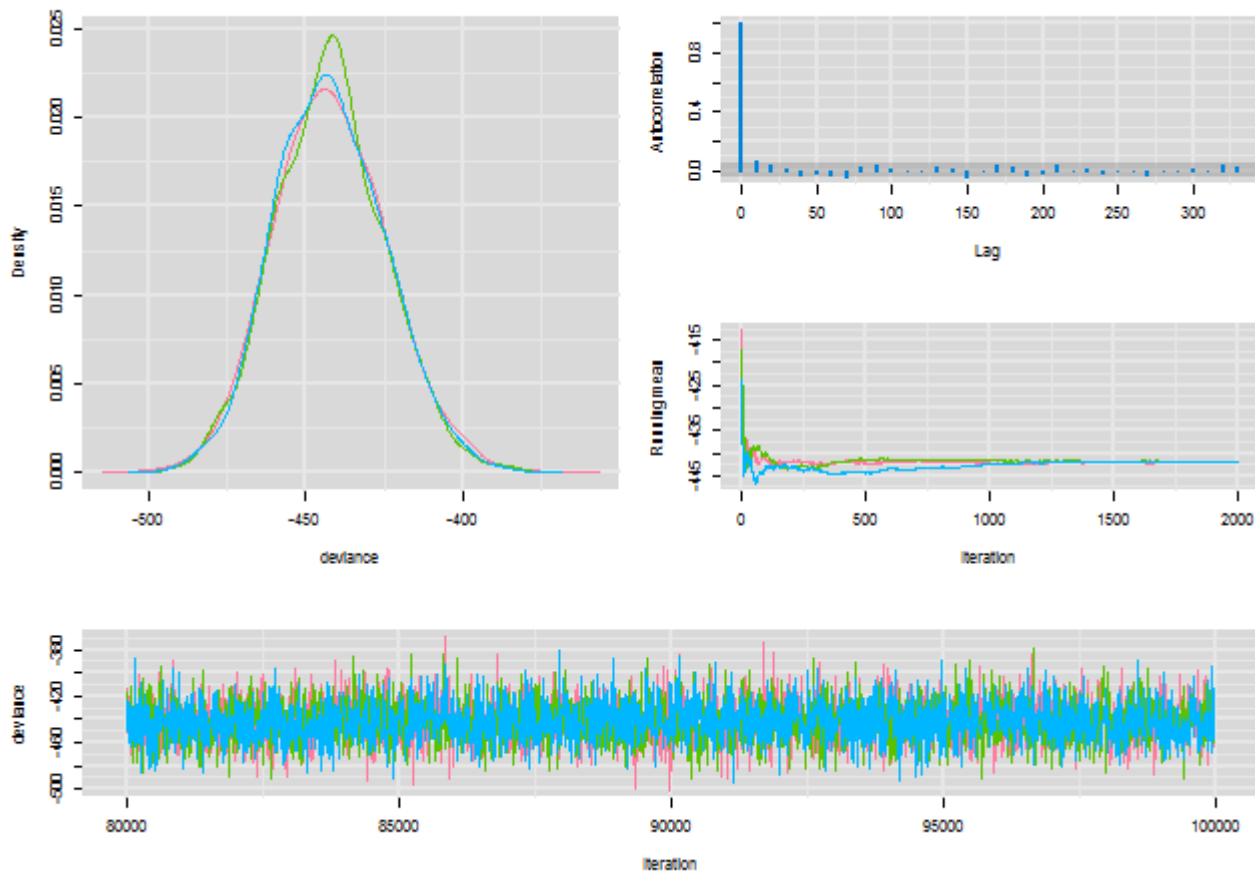

Supplement: JRSM-10-267-s003.pdf [file JRSM-10-267-s003.pdf]
