# Supplementary material for: Modelling time‐course relationships with multiple treatments: Model‐based network meta‐analysis for continuous summary outcomes
Source: PubMed Central journal article supplement (PMC6563489; doi:10.1002/jrsm.1351), 2019-05-29

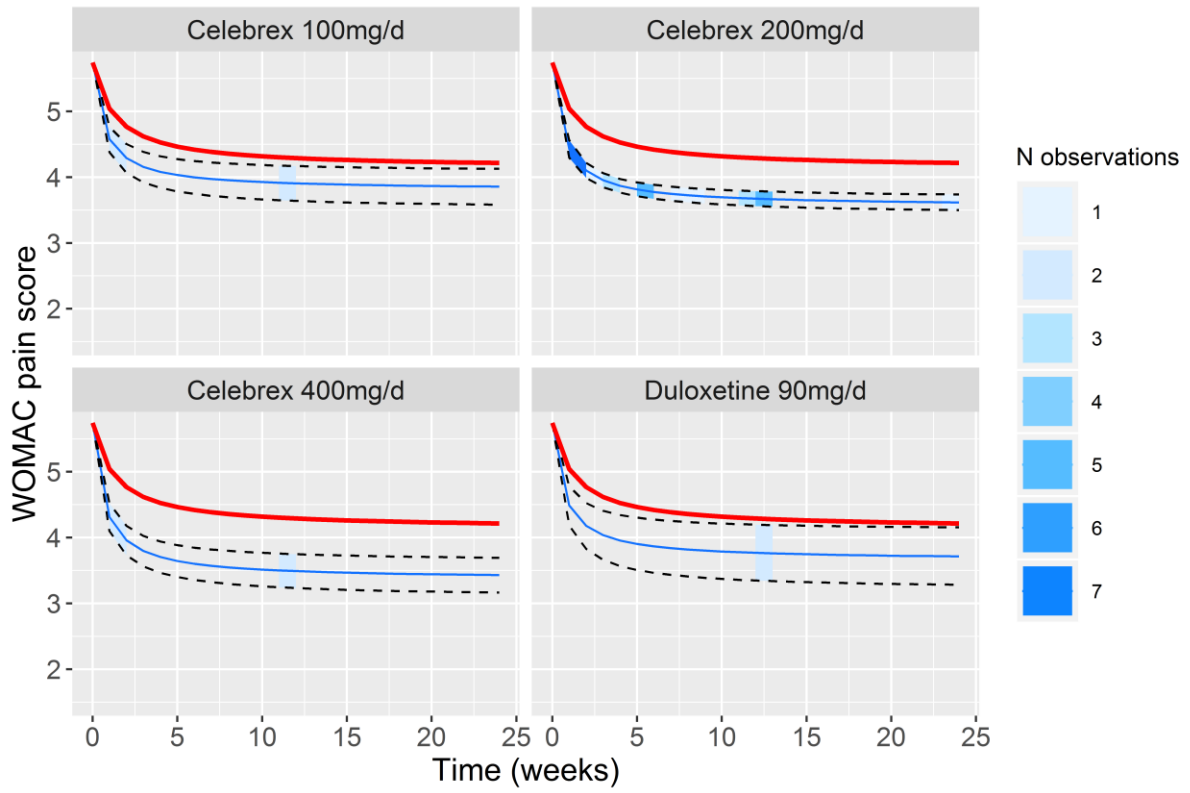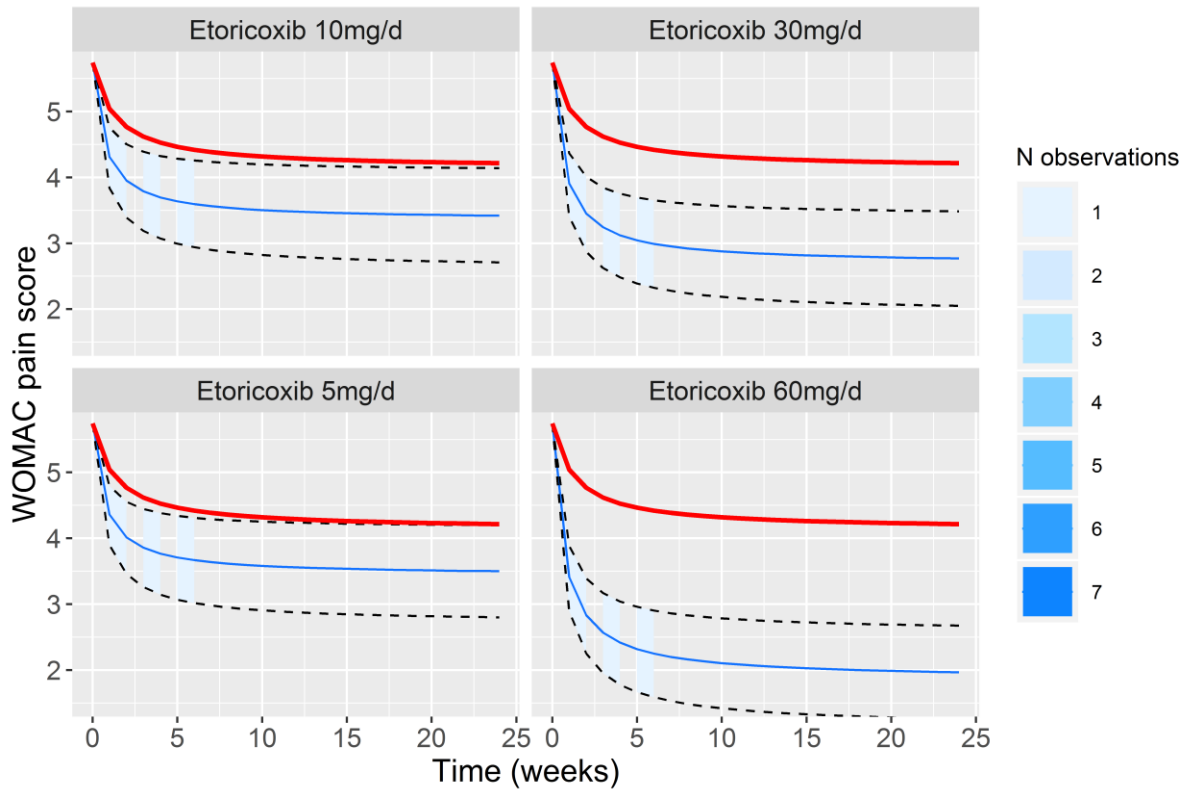

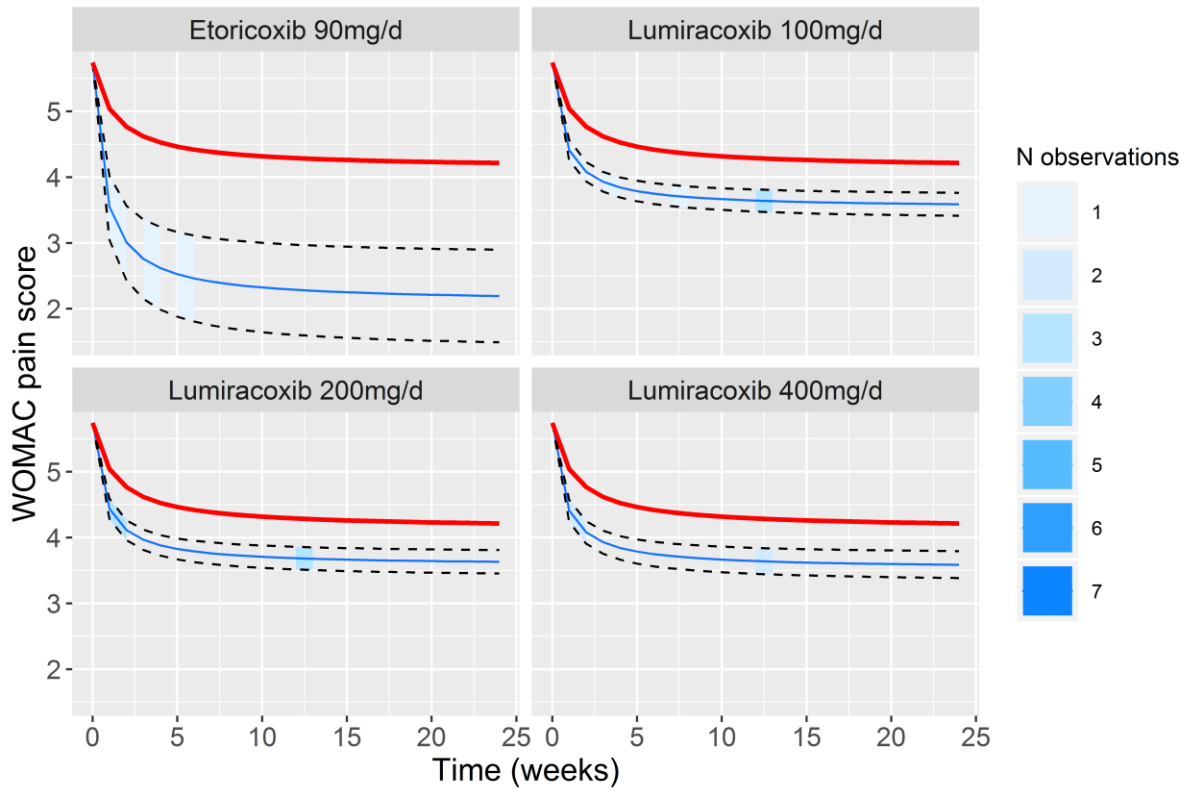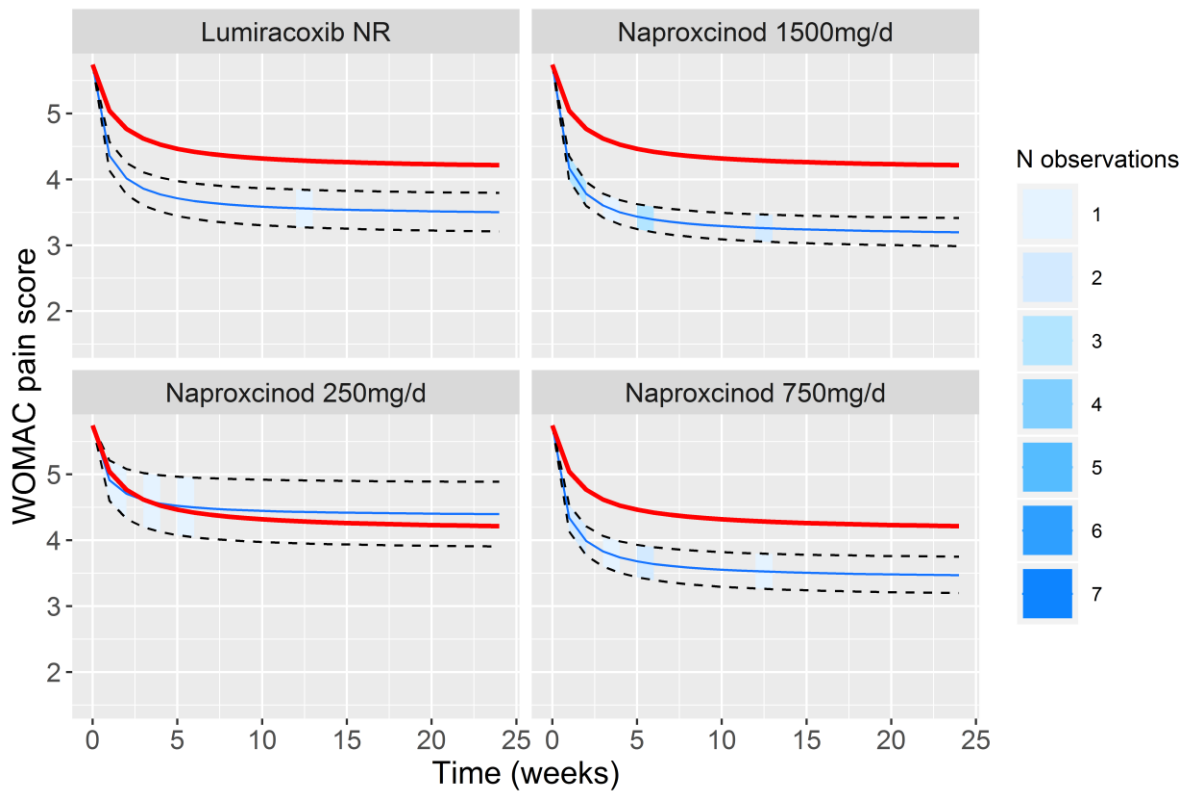

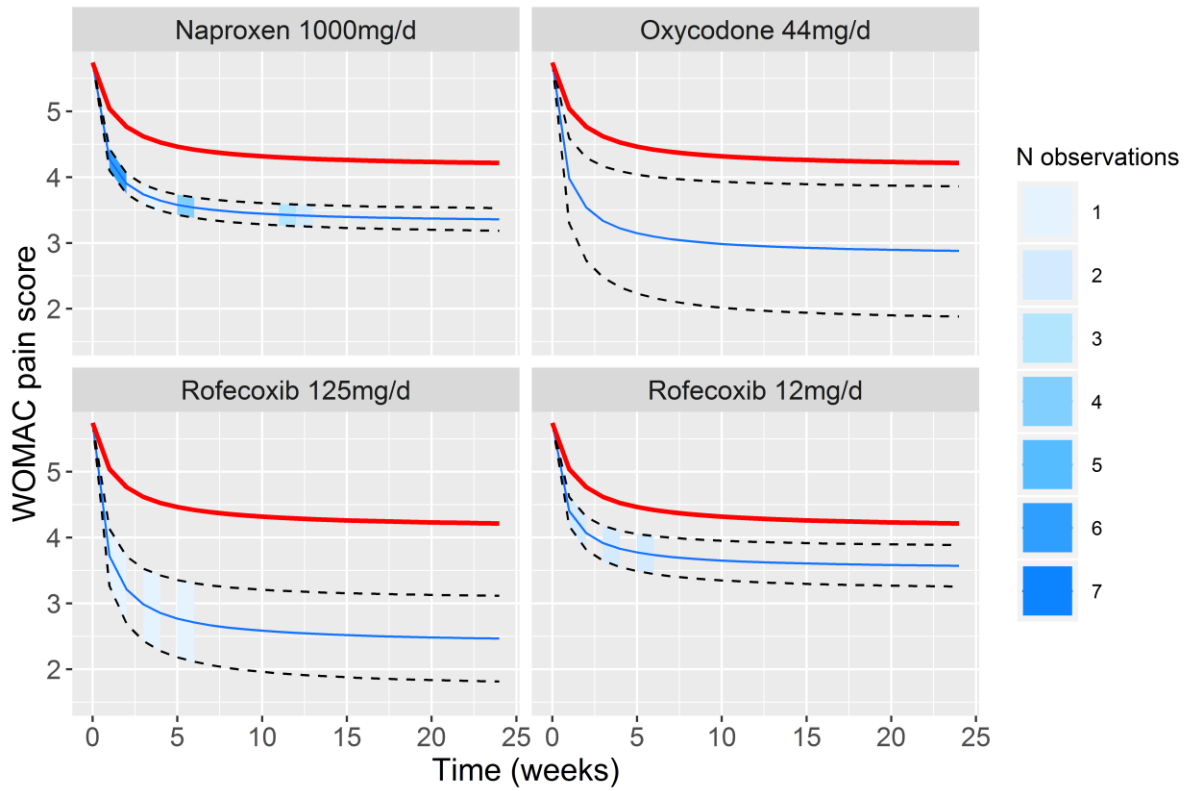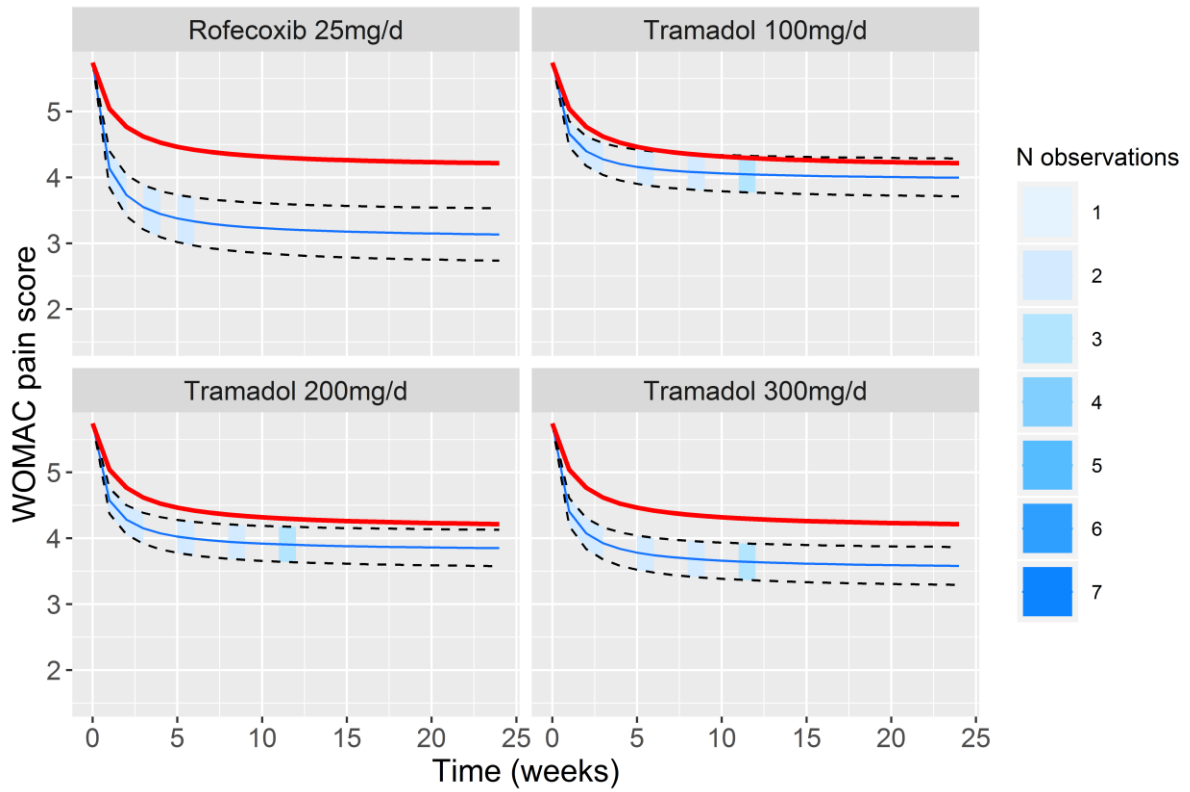

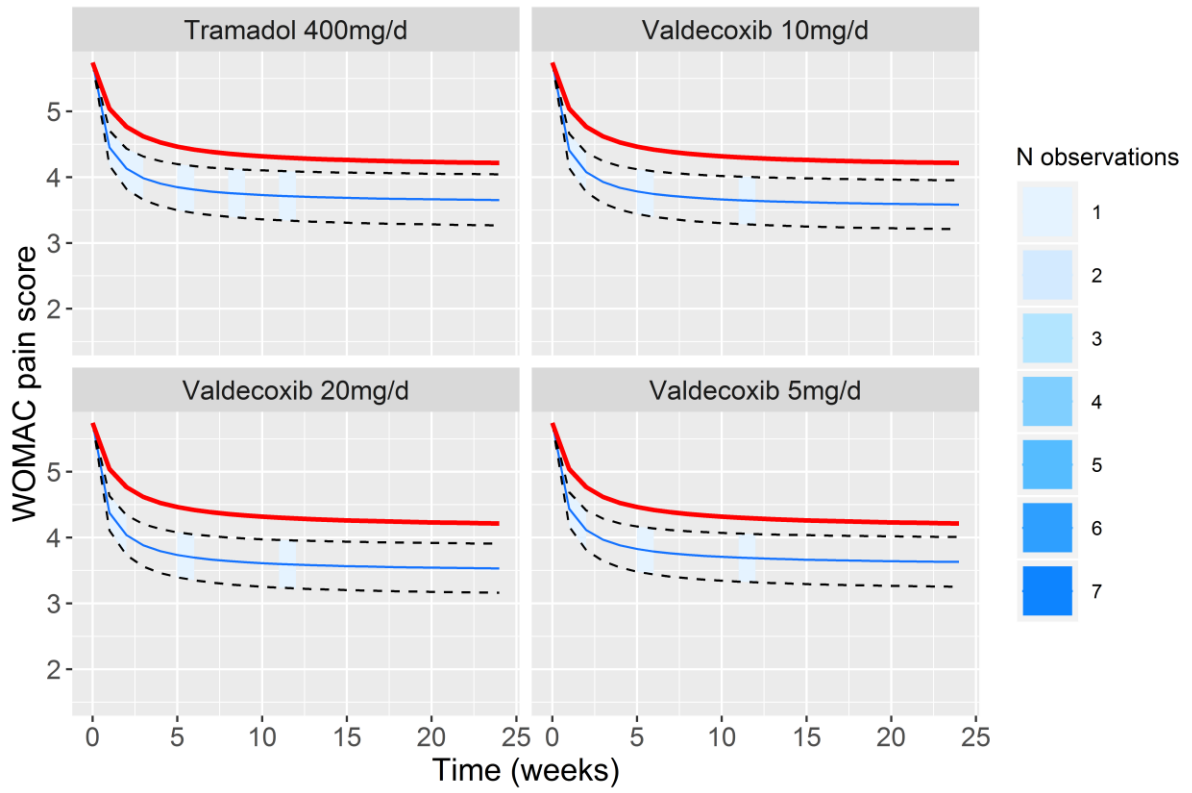

Supplement: JRSM-10-267-s032.pdf [file JRSM-10-267-s032.pdf]
